# Supplementary material for: A genome-wide association study with tissue transcriptomics identifies genetic drivers for classic bladder exstrophy
Source: PubMed Central journal article supplement (PMC9646906; doi:10.1038/s42003-022-04092-3), 2022-11-09
Supplement: 42003_2022_4092_MOESM1_ESM.pdf [file 42003_2022_4092_MOESM1_ESM.pdf]

## Supplementary Information

### **A genome-wide association study with tissue transcriptomics identifies genetic drivers for classic bladder exstrophy**

**Authors** Enrico Mingardo, Glenda Beaman, Philip Grote, Agneta Nordenskjöld, William Newman, Adrian S. Woolf, Markus Eckstein, Alina C. Hilger, Gabriel C. Dworschak, Wolfgang Rösch, Anne-Karolin Ebert, Raimund Stein, Alfredo Brusco, Massimo Di Grazia, Ali Tamer, Federico M. Torres, Jose L. Hernandez, Philipp Erben, Carlo Maj, Jose M. Olmos, Jose A. Riancho, Carmen Valero, Isabel C. Hostettler, Henry Houlden, David J. Werring, Johannes Schumacher, Jan Gehlen, Ann-Sophie Giel, Benedikt C. Buerfent, Samara Arkani, Elisabeth Åkesson, Emilia Rotstein, Michael Ludwig, Gundela Holmdahl, Elisa Giorgio, Alfredo Berettini, David Keene, Raimondo M. Cervellione, Nina Younsi, Melissa Ortlieb, Josef Oswald, Bernhard Haid, Martin Promm, Claudia Neissner, Karin Hirsch, Maximilian Stehr, Frank-Mattias Schäfer, Eberhard Schmiedeke, Thomas M. Boemers, Iris A. L. M. van Rooij, Wouter F. J. Feitz, Carlo L. M. Marcelis, Martin Lacher, Jana Nelson, Benno Ure, Caroline Fortmann, Daniel P. Gale, Melanie M. Y. Chan, Kerstin U. Ludwig, Markus M. Nöthen, Stefanie Heilmann, Nadine Zwink, Ekkehart Jenetzky, Benjamin Odermatt, Michael Knapp, Heiko Reutter

**Supplementary Table 1.** Number of cases and controls for the seven independent samples

| Sample  | No of Cases | No of Controls |
|---------|-------------|----------------|
| GWAS1   | 98          | 526            |
| GWAS2   | 110         | 1.177          |
| Central | 172         | 2.588          |
| Italy   | 57          | 1.325          |
| Spain   | 62          | 279            |
| Sweden  | 80          | 238            |
| UK      | 49          | 1.219          |

**Supplementary Table 2.** Primer sequences used for *EFNA1* re-sequencing

|                 |                        |
|-----------------|------------------------|
| EFNA1 EX1 FWD   | AAAGGCGGAGTCGCTAGG     |
| EFNA1 EX1 REV   | GGGGTGCTCCCAGATATGAC   |
| EFNA1 EX2 FWD   | CTTGGGGTCCAGTGTGAAAT   |
| EFNA1 EX2 REV   | GCTAAACAGAGTGCCCAGCA   |
| EFNA1 EX3-4 FWD | GAGTAGGGGAGCTGAGAAAGCA |
| EFNA1 EX3-4 REV | CTCTCAGCCCAACAGGATTC   |
| EFNA1 EX5 FWD   | AAGGGGTCTGCTTGAAGAGG   |
| EFNA1 EX5 REV   | CGTTTTGAGGCTGCTAGGTG   |

Legend: exon (EX); Forward (FWD); Reverse (REV).

**Supplementary Table 3.** Linkage Disequilibrium (LD) blocks coordinates (hg19) for CBE associated top variants.

| Marker     | Chromosome (chr) | chr Start | chr End   |
|------------|------------------|-----------|-----------|
| rs1924557  | chr1             | n.a.      | n.a.      |
| rs4745     | chr1             | 155089883 | 155142927 |
| rs80215221 | chr3             | 137538620 | 137558922 |
| rs6874700  | chr5             | 50659788  | 50748173  |
| rs1790471  | chr11            | 119964758 | 119968219 |
| rs10862001 | chr12            | 79847040  | 80114135  |
| rs10853087 | chr17            | 44989888  | 45046865  |
| rs6024978  | chr20            | 55161209  | 55175996  |

Legend: n.a. = no LD association.

**Supplementary table 4.** Re-sequencing of EFNA1

| Patients (n) | cDNA / protein change         | exon / intron | SNP ID       | gnomAD allele Frequency | Mutation Taster | PolyPhen-2  | SIFT              | CADD |
|--------------|-------------------------------|---------------|--------------|-------------------------|-----------------|-------------|-------------------|------|
| n=1          | 93-36T>C                      | intron1       | rs369393260  | 0.000256                |                 |             |                   |      |
| n=1          | c.92+31G>A                    | intron1       | rs372698388  | 0.00024                 |                 |             |                   |      |
| n=1          | c.92+117C>A                   | intron1       | not reported | 0                       |                 |             |                   |      |
| n=1          | c.92+147C>G                   | intron 1      | not reported | 0                       |                 |             |                   |      |
| n=1          | c.116T>C p.Ile39Thr           | exon 2        | not reported | 0                       | disease causing | deleterious | possibly damaging | 25.3 |
| n=1          | c.156G>A p.Pro52=             | exon 2        | rs376532577  | 0.000028                | =               | =           | =                 | 21.5 |
| n=1          | c.167A>G p.Asp56Gly           | exon 2        | not reported | 0                       | disease causing | tolerated   | benign            | 22.0 |
| n=1          | c.341delT<br>p.Phe114Serfs*28 | exon 2        | not reported | 0                       | LoF             | LoF         | LoF               | 25.6 |
| n=1          | c.455-13T>C                   | intron3       | not reported | 0                       |                 |             |                   |      |
| n=1          | c.454+75A>G                   | intron3       | rs1033536381 | 6.6 x 10 <sup>-06</sup> |                 |             |                   |      |
| n=1          | c.454+61A>T                   | intron3       | not reported | 0                       |                 |             |                   |      |
| n=1          | c.455-52C>T                   | intron 3      | not reported | 0                       |                 |             |                   |      |
| n=1          | c.503C>T p.Ala168Val          | exon 4        | not reported | 0                       | disease causing | tolerated   | benign            | 6.97 |
| n=1          | c.521G>A p.Arg174Gln          | exon 5        | rs139969988  | 0.00059                 | benign          | tolerated   | benign            | 5.03 |

Legend: LoF = Loss-of-function

**Supplementary Figure 1:** Regional association result of genome-wide significant locus for chromosome 1, region 1.

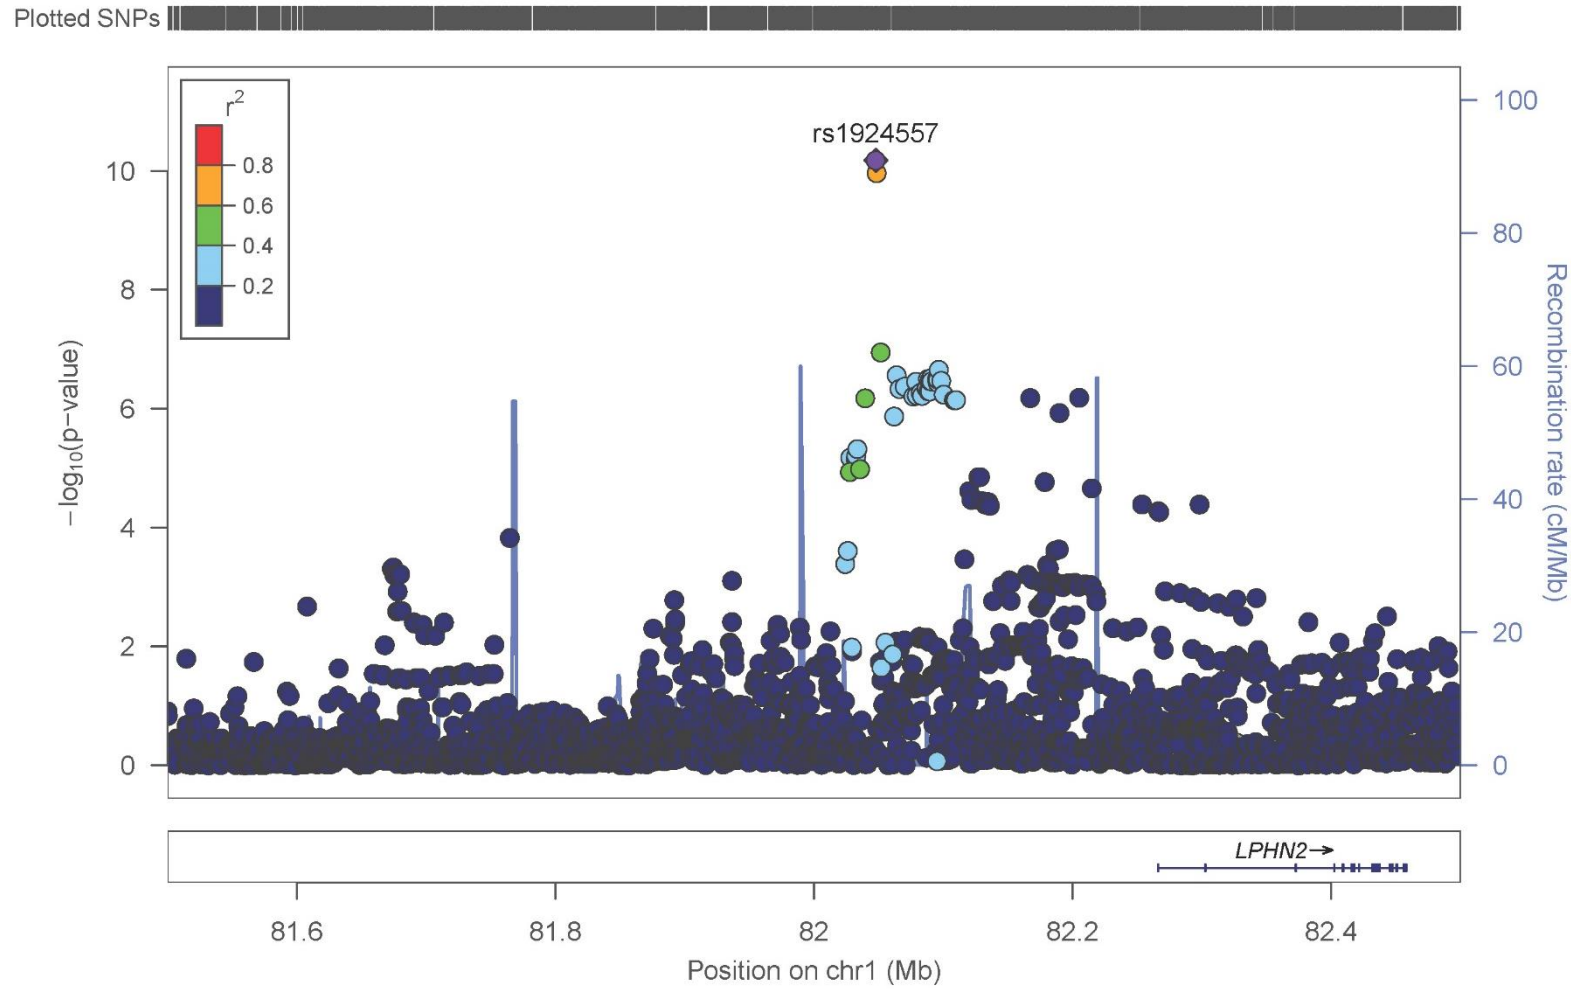

Every dot is a SNP in a 1 Megabase (Mb) window. X-axes represent chromosome position of the SNP and the relative genes position in the locus. Y-axes represent  $-\log_{10}(P\text{-value})$  of each SNP. Blue peaks indicate the Recombination rate (cM/Mb). Colours of SNP represent the  $r^2$  LD-block value. The most significant SNP is labelled in purple.

**Supplementary Figure 2:** Regional association result of genome-wide significant locus for chromosome 1, region 2.

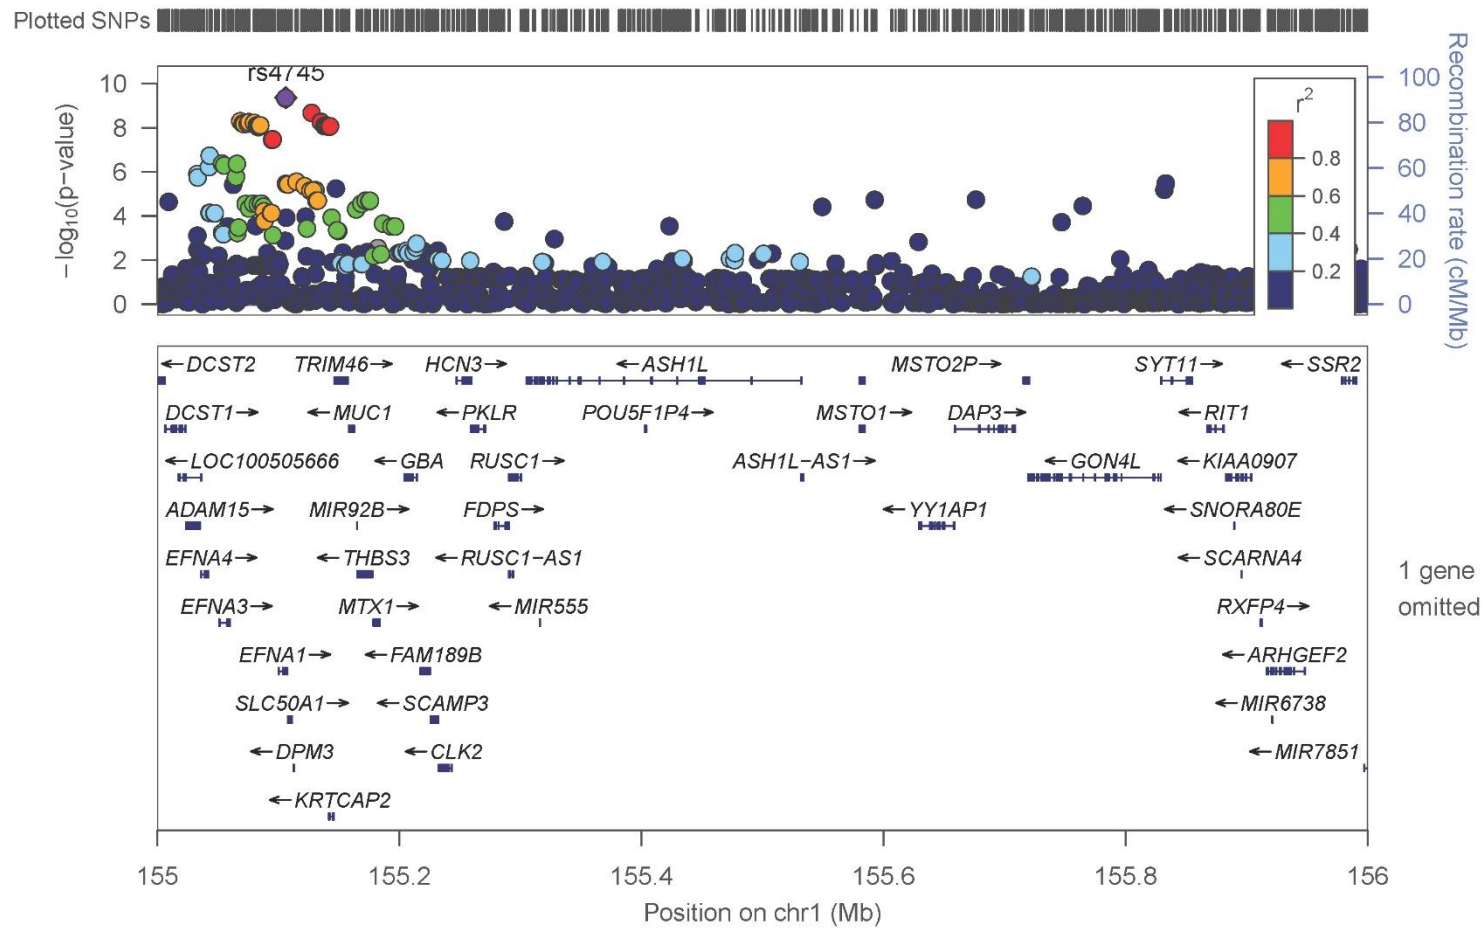

Every dot is a SNP in a 1 Megabase (Mb) window. X-axes represent chromosome position of the SNP and the relative genes position in the locus. Y-axes represent  $-\log_{10}(P\text{-value})$  of each SNP. Blue peaks indicate the Recombination rate (cM/Mb). Colours of SNP represent the  $r^2$  LD-block value. The most significant SNP is labelled in purple.

**Supplementary Figure 3:** Regional association result of genome-wide significant locus for chromosome 3.

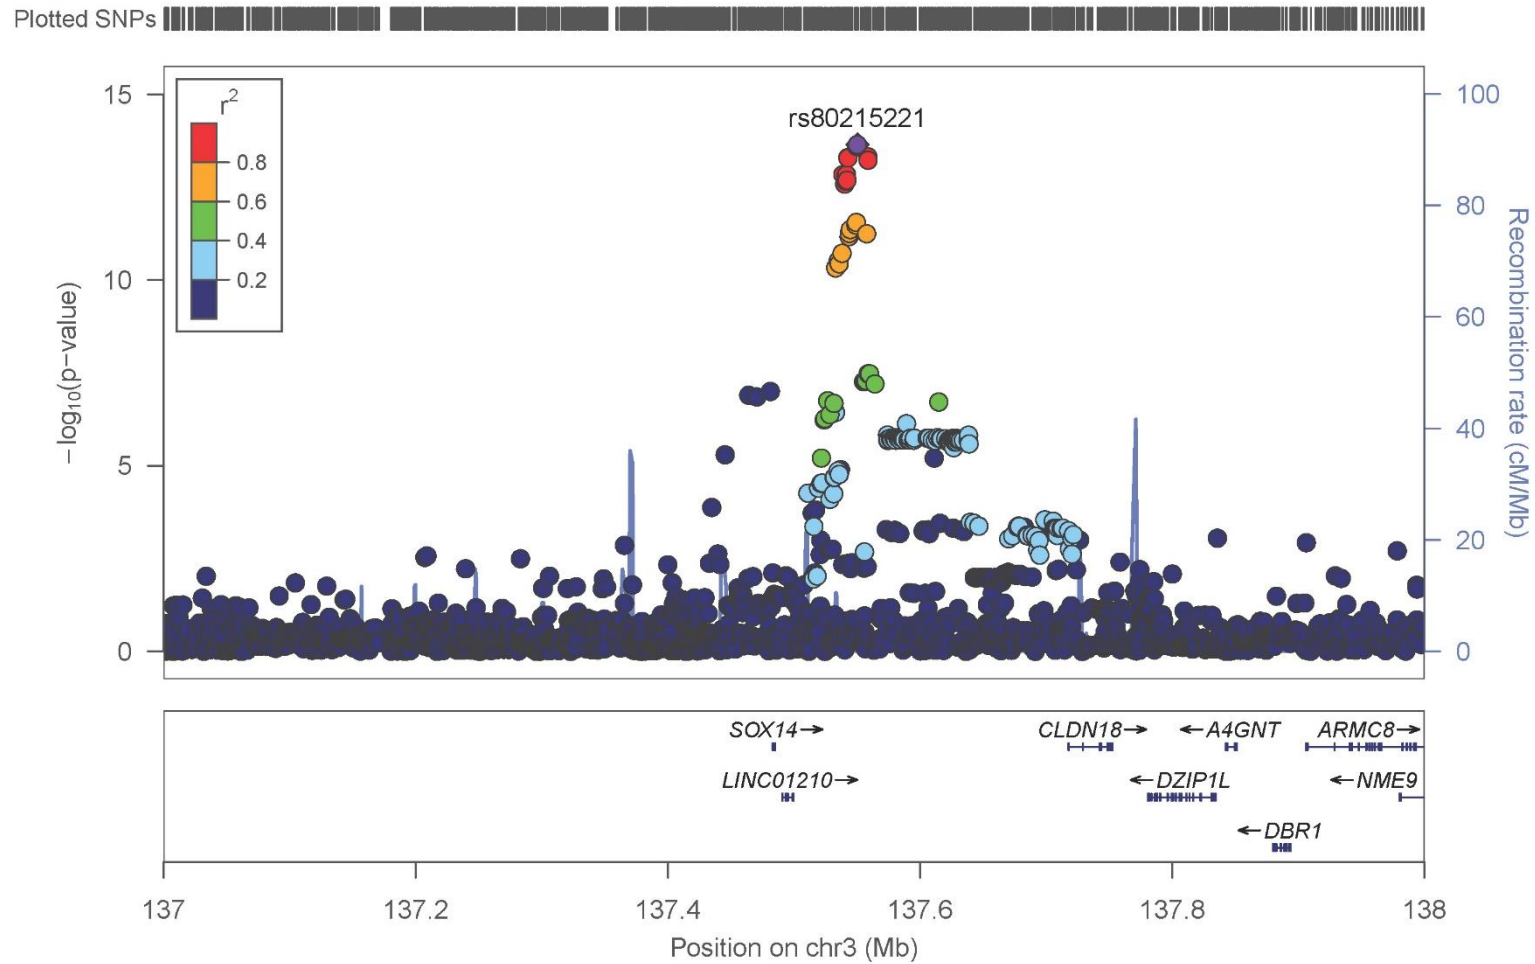

Every dot is a SNP in a 1 Megabase (Mb) window. X-axes represent chromosome position of the SNP and the relative genes position in the locus. Y-axes represent  $-\log_{10}(P\text{-value})$  of each SNP. Blue peaks indicate the Recombination rate (cM/Mb). Colours of SNP represent the  $r^2$  LD-block value. The most significant SNP is labelled in purple.

**Supplementary Figure 4:** Regional association result of genome-wide significant locus for chromosome 5.

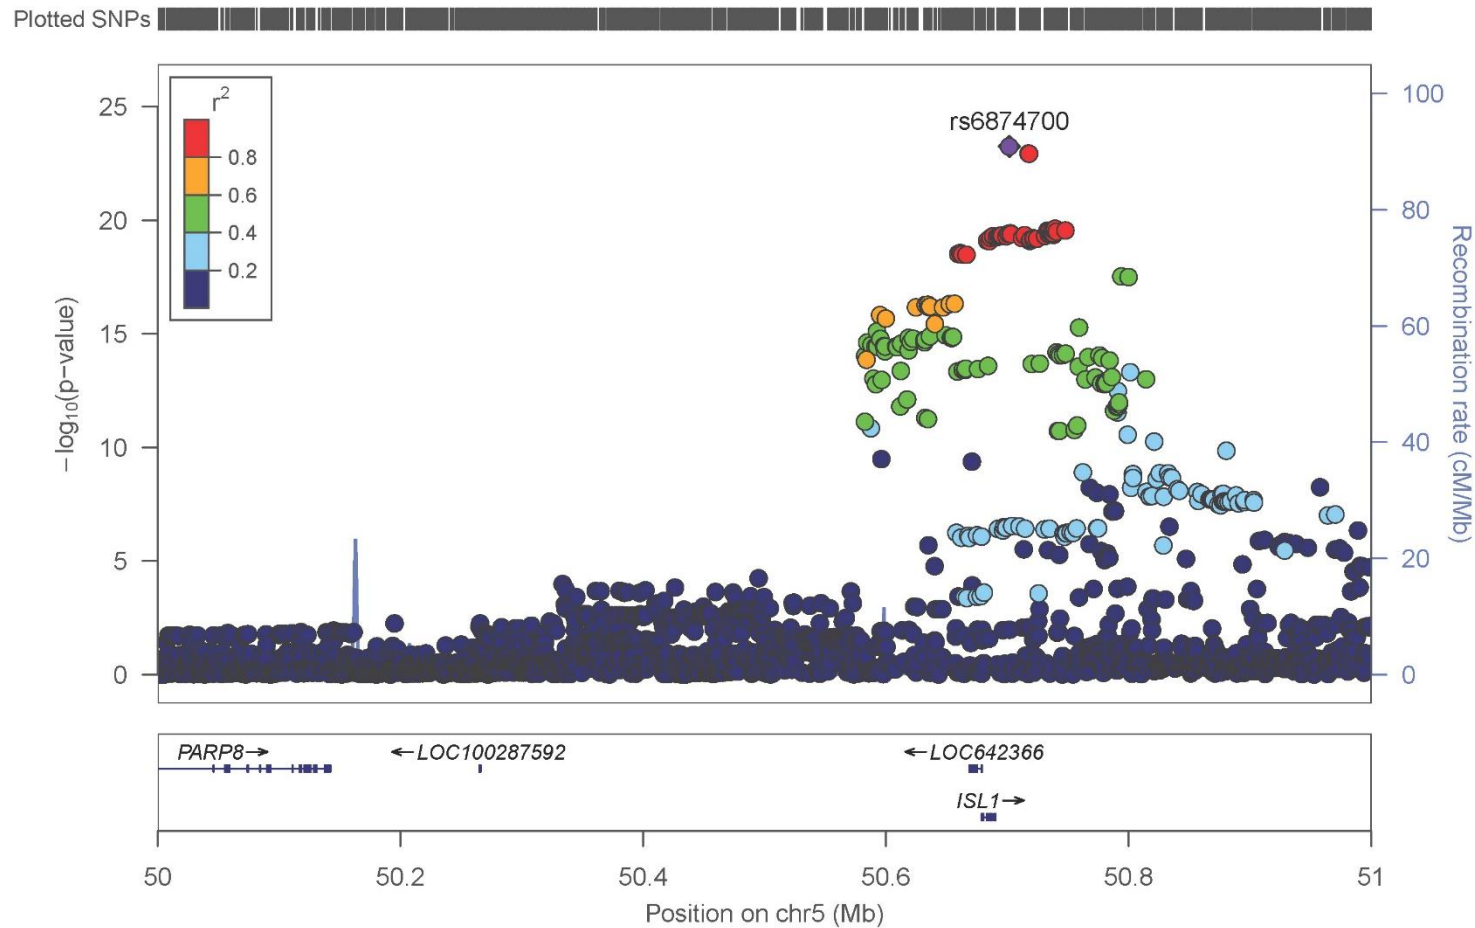

Every dot is a SNP in a 1 Megabase (Mb) window. X-axes represent chromosome position of the SNP and the relative genes position in the locus. Y-axes represent  $-\log_{10}(P\text{-value})$  of each SNP. Blue peaks indicate the Recombination rate (cM/Mb). Colours of SNP represent the  $r^2$  LD-block value. The most significant SNP is labelled in purple.



**Supplementary Figure 5:** Regional association result of genome-wide significant locus for chromosome 11

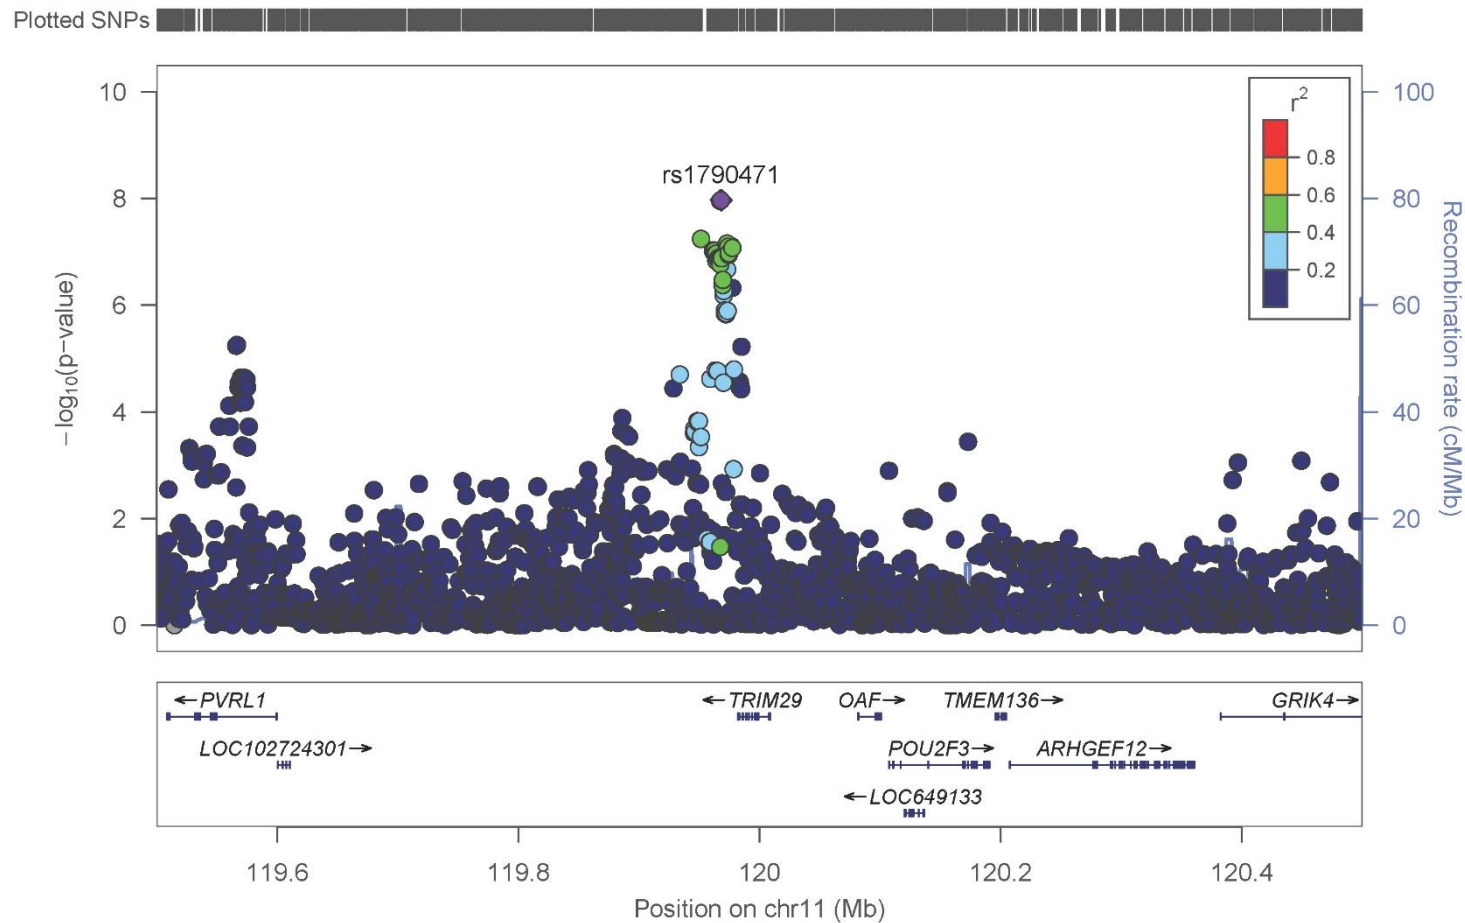

Every dot is a SNP in a 1 Megabase (Mb) window. X-axes represent chromosome position of the SNP and the relative genes position in the locus. Y-axes represent  $-\log_{10}(P\text{-value})$  of each SNP. Blue peaks indicate the Recombination rate (cM/Mb). Colours of SNP represent the  $r^2$  LD-block value. The most significant SNP is labelled in purple.

**Supplementary Figure 6:** Regional association result of genome-wide significant locus for chromosome 12

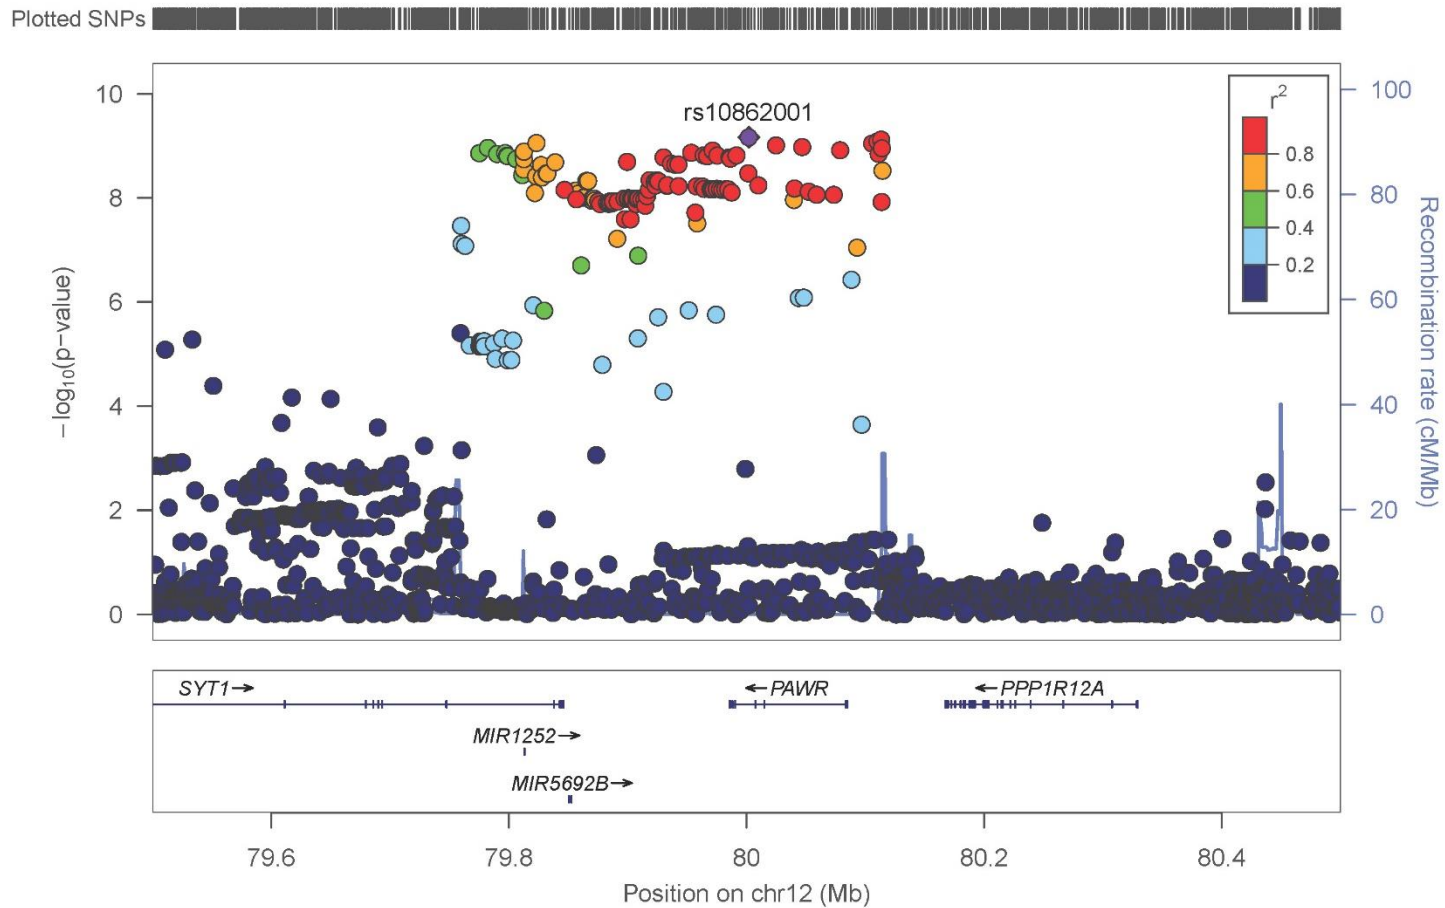

Every dot is a SNP in a 1 Megabase (Mb) window. X-axes represent chromosome position of the SNP and the relative genes position in the locus. Y-axes represent  $-\log_{10}(P\text{-value})$  of each SNP. Blue peaks indicate the Recombination rate (cM/Mb). Colours of SNP represent the  $r^2$  LD-block value. The most significant SNP is labelled in purple.

**Supplementary Figure 7: Regional association result of genome-wide significant locus for chromosome 17**

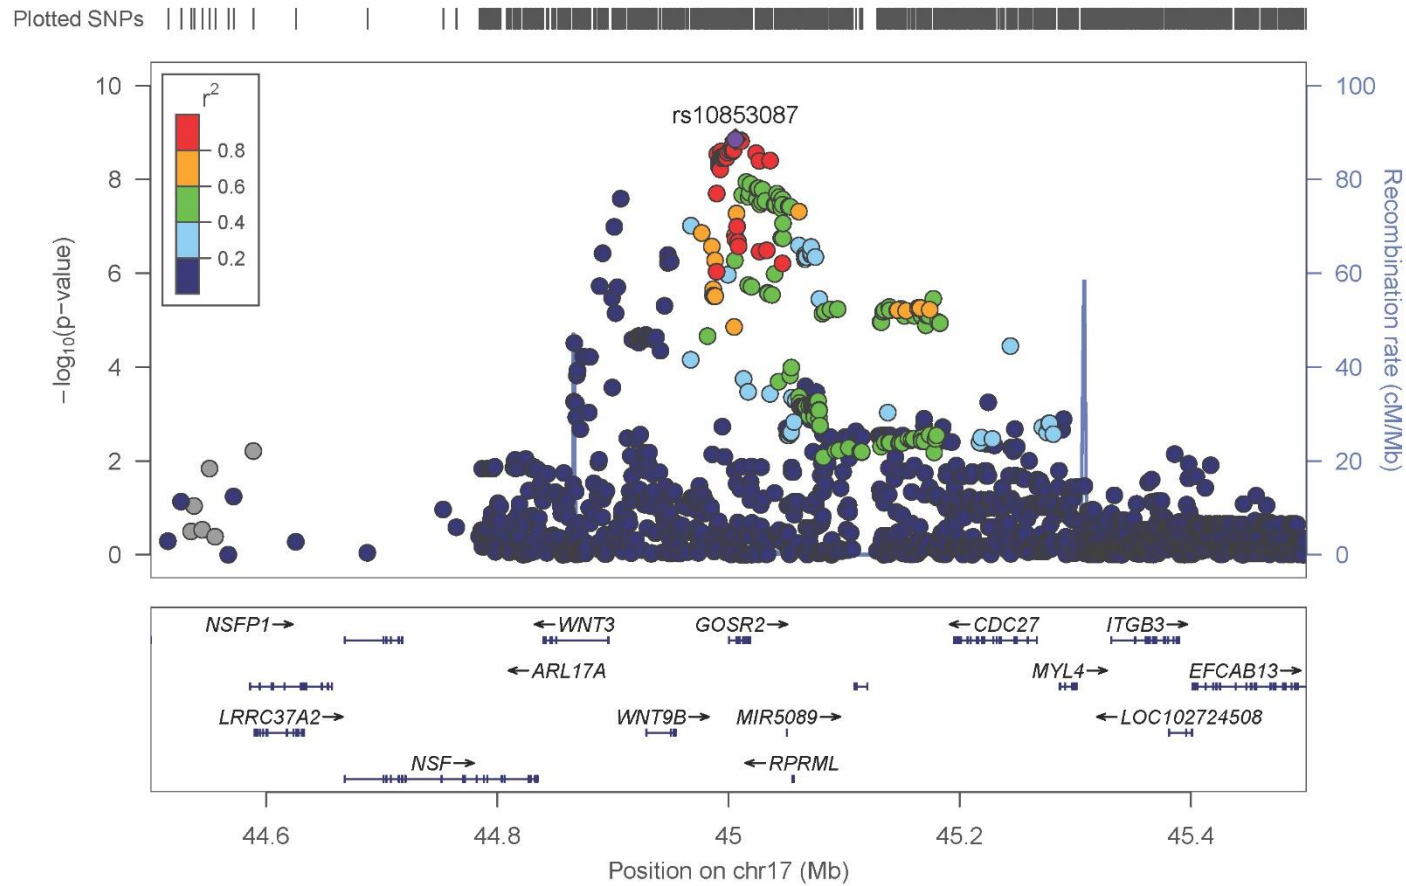

Every dot is a SNP in a 1 Megabase (Mb) window. X-axes represent chromosome position of the SNP and the relative genes position in the locus. Y-axes represent  $-\log_{10}(P\text{-value})$  of each SNP. Blue peaks indicate the Recombination rate (cM/Mb). Colours of SNP represent the  $r^2$  LD-block value. The most significant SNP is labelled in purple.

**Supplementary Figure 8:** Regional association result of genome-wide significant locus for chromosome 20

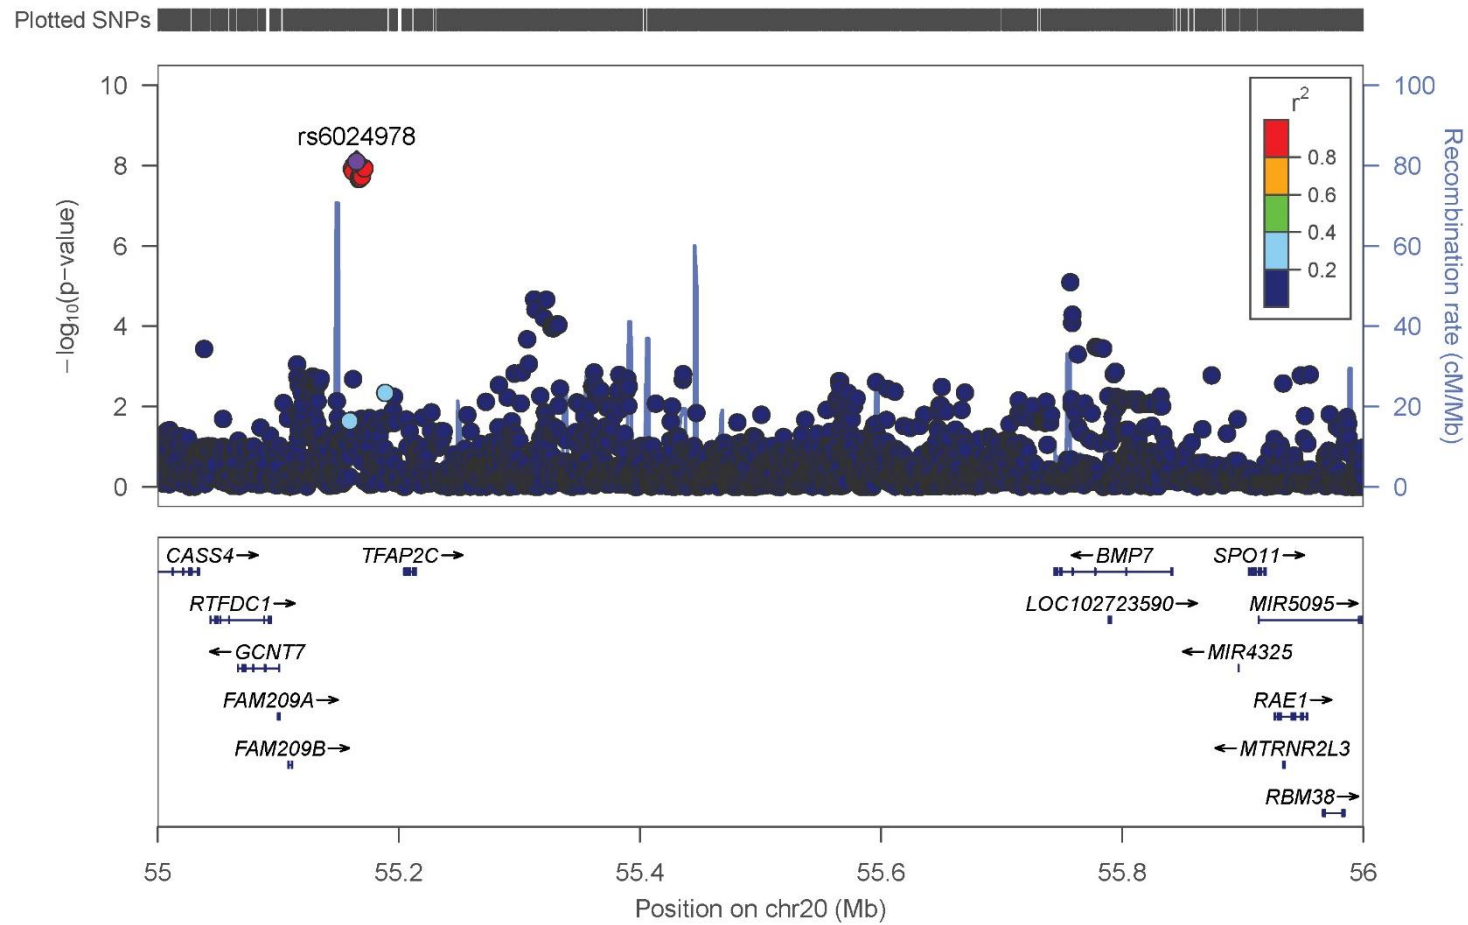

Every dot is a SNP in a 1 Megabase (Mb) window. X-axes represent chromosome position of the SNP and the relative genes position in the locus. Y-axes represent  $-\log_{10}(P\text{-value})$  of each SNP. Blue peaks indicate the Recombination rate (cM/Mb). Colours of SNP represent the  $r^2$  LD-block value. The most significant SNP is labelled in purple.

Supplementary Figure 9: Principal component analysis of Central Europe cohort.

### Central Europe

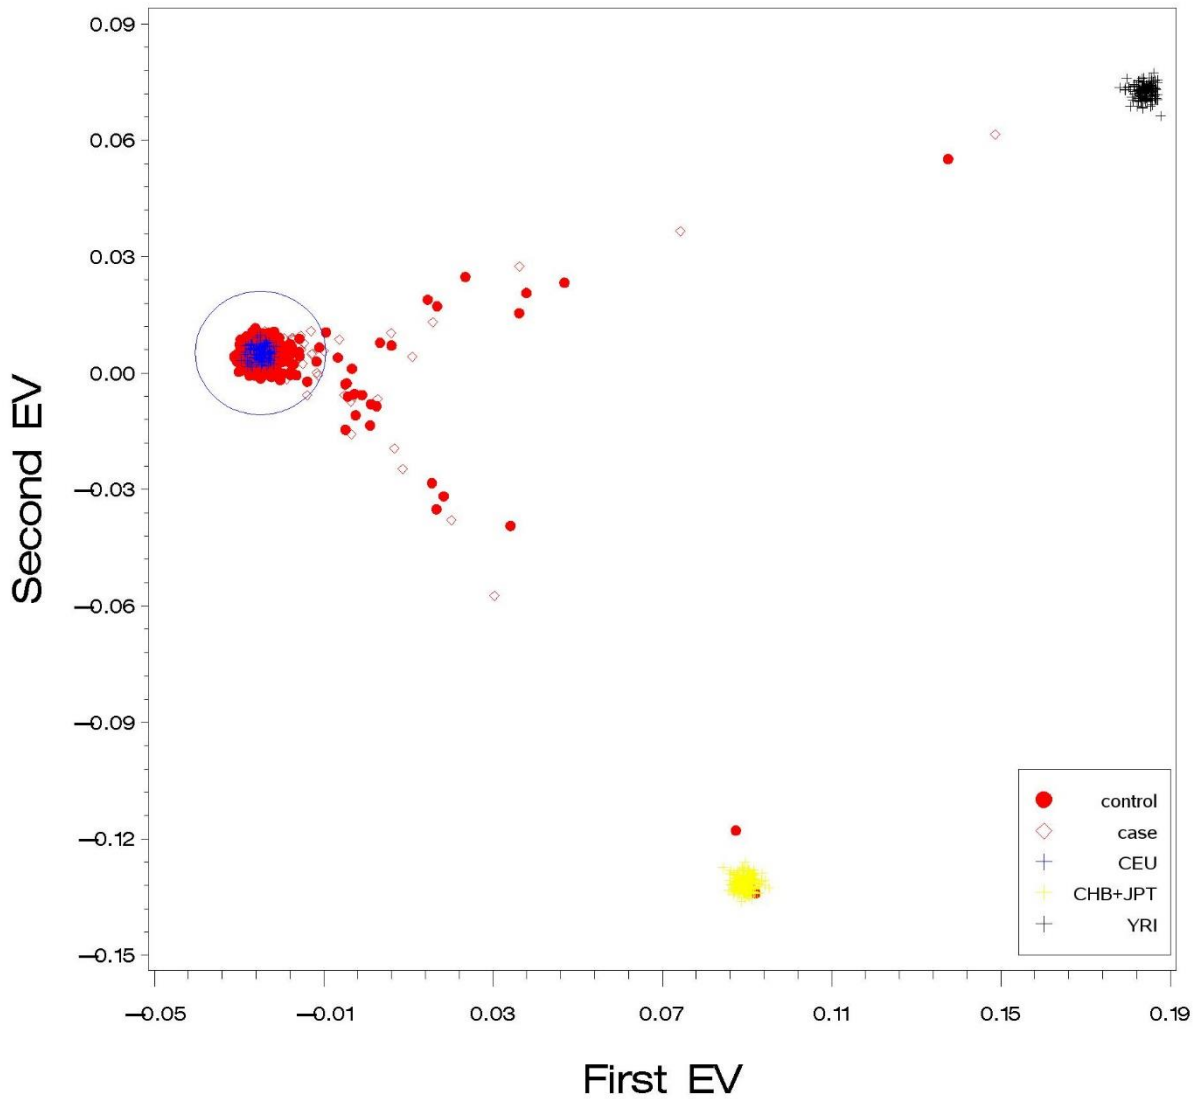

Only individuals within the red ellipses defined by condition (1) were used for the statistical analysis, individuals outside the red ellipsis were discarded. (CEU) Utah Residents from North and West Europe; (CHB) Han Chinese in Beijing, China; (JPT) Japanese in Tokyo, Japan; (YRI) Yoruba in Ibadan, Nigeria.

**Supplementary Figure 10:** Principal component analysis of Spain cohort.

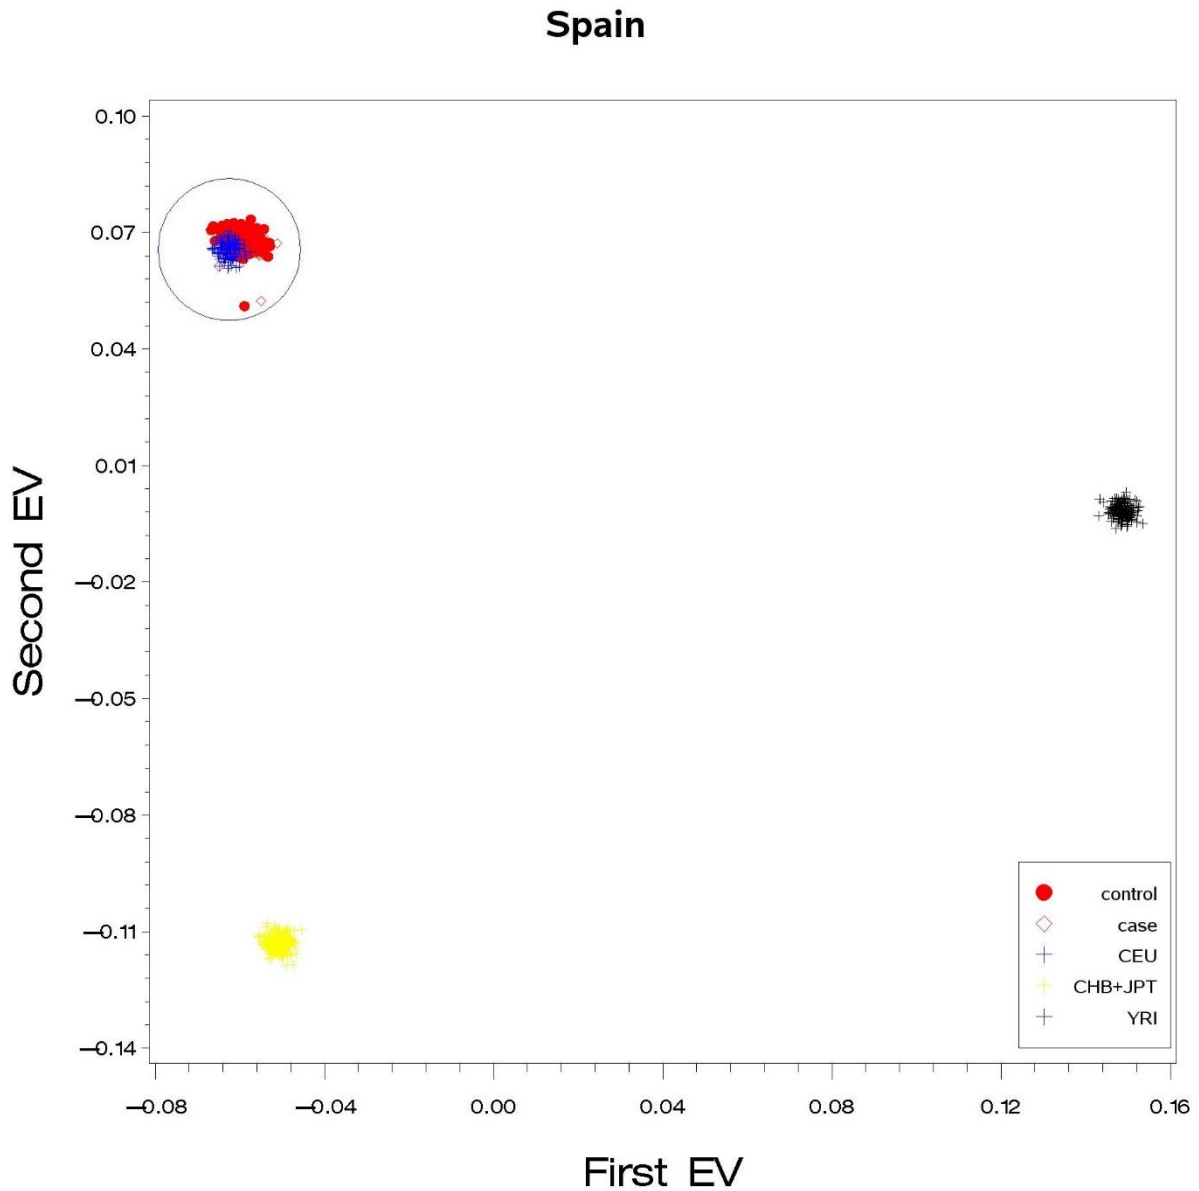

Only individuals within the red ellipses defined by condition (1) were used for the statistical analysis, individuals outside the red ellipsis were discarded. (CEU) Utah Residents from North and West Europe; (CHB) Han Chinese in Beijing, China; (JPT) Japanese in Tokyo, Japan; (YRI) Yoruba in Ibadan, Nigeria.

**Supplementary Figure 11:** Principal component analysis of Italy cohort.

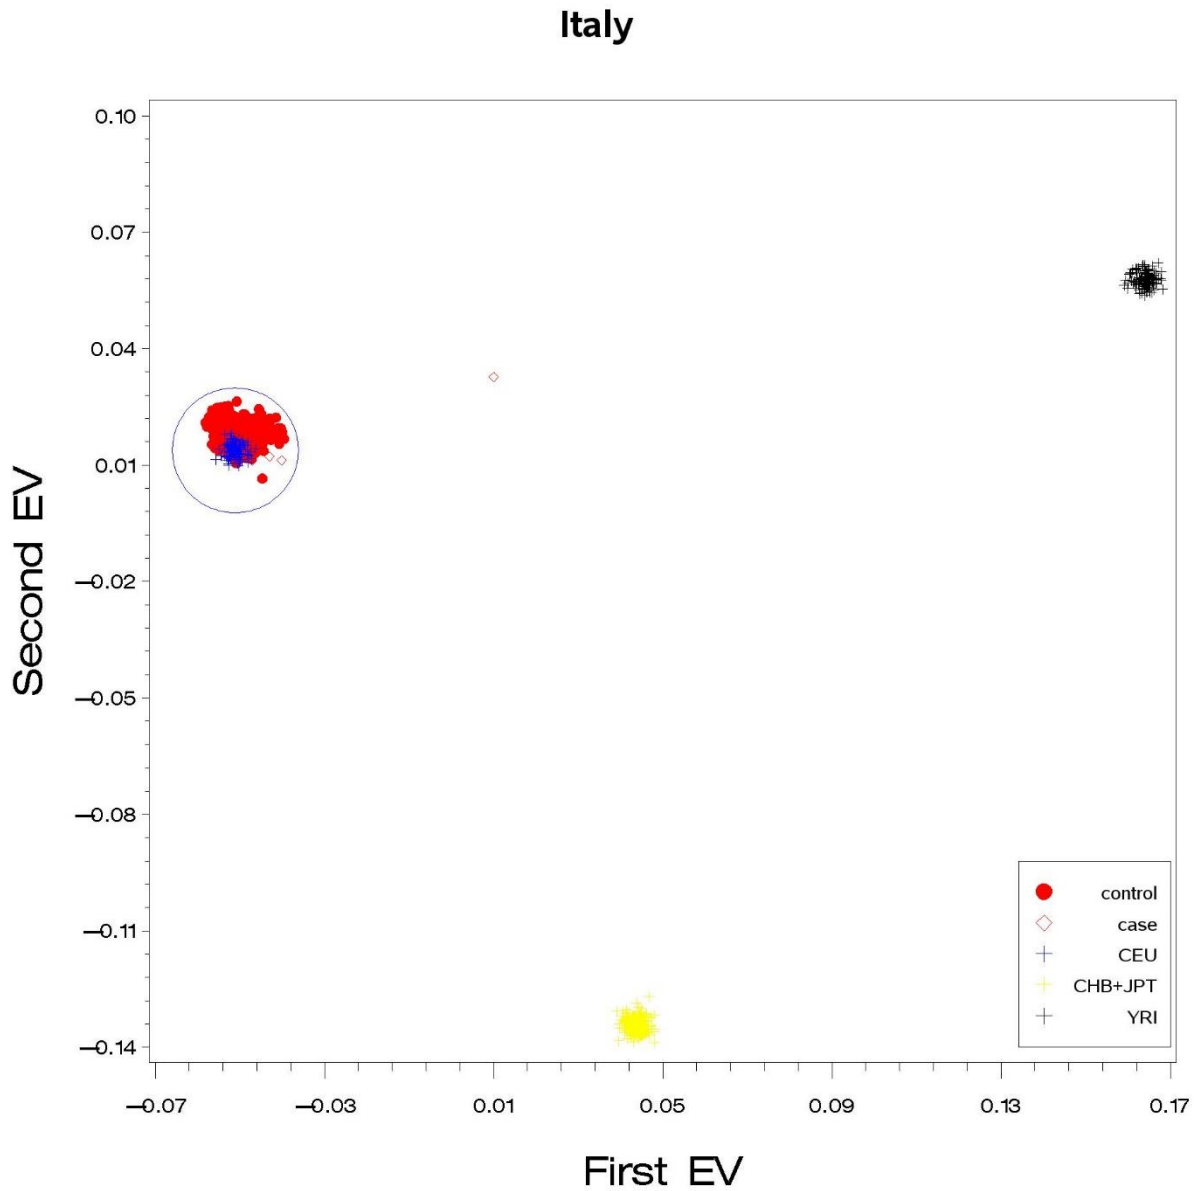

Only individuals within the red ellipses defined by condition (1) were used for the statistical analysis, individuals outside the red ellipsis were discarded. (CEU) Utah Residents from North and West Europe; (CHB) Han Chinese in Beijing, China; (JPT) Japanese in Tokyo, Japan; (YRI) Yoruba in Ibadan, Nigeria.

Supplementary Figure 12: Principal component analysis of UK cohort

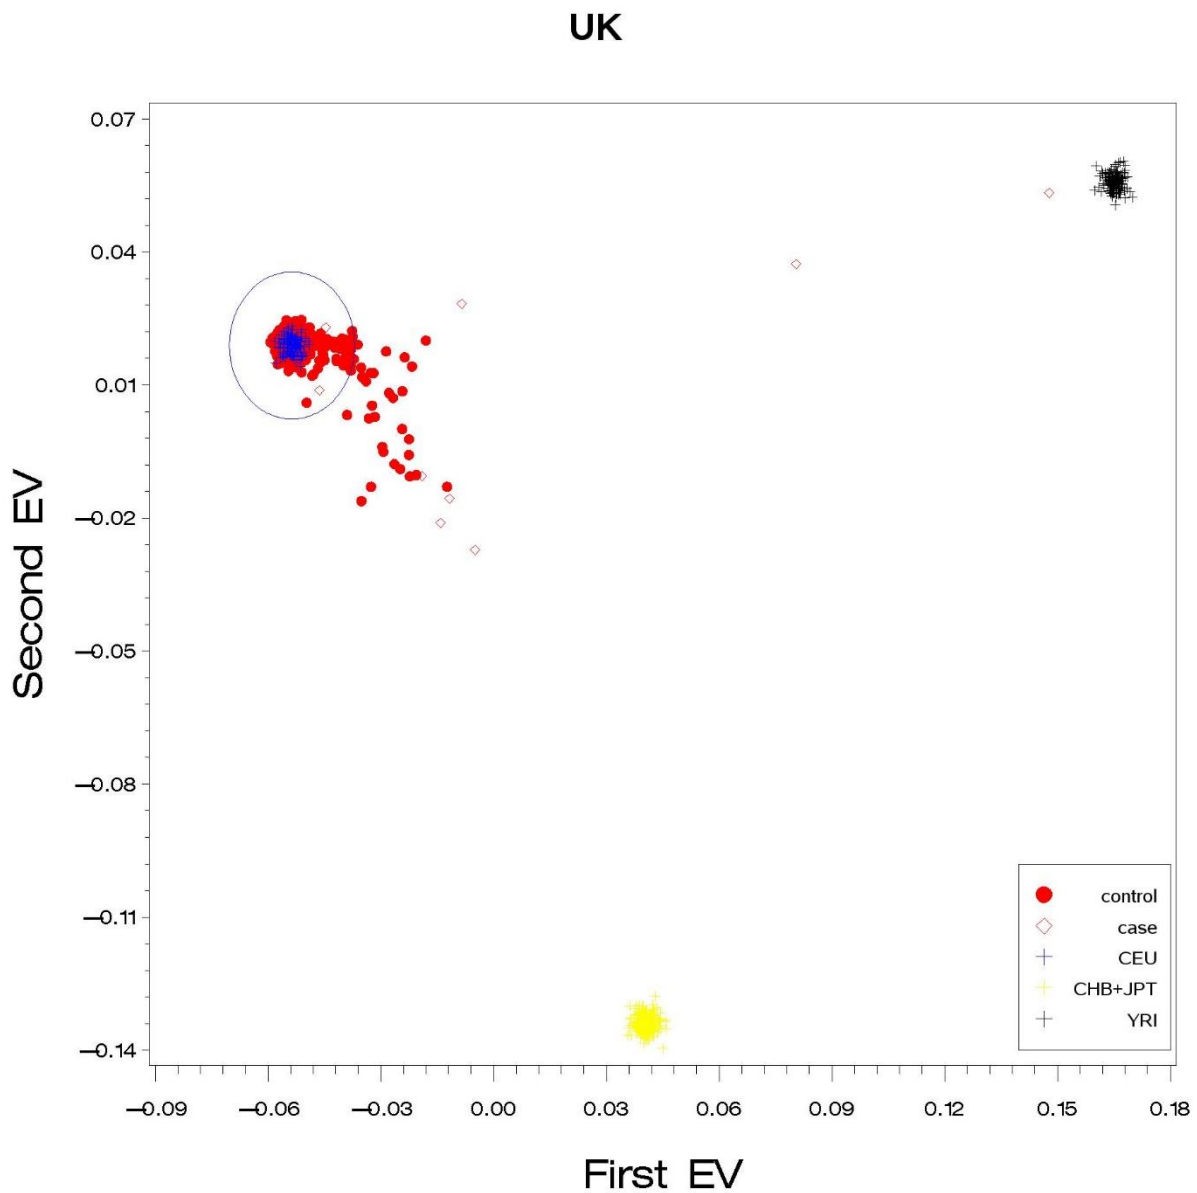

Only individuals within the red ellipses defined by condition (1) were used for the statistical analysis, individuals outside the red ellipsis were discarded. (CEU) Utah Residents from North and West Europe; (CHB) Han Chinese in Beijing, China; (JPT) Japanese in Tokyo, Japan; (YRI) Yoruba in Ibadan, Nigeria.



Supplementary Figure 13: Principal component analysis of Sweden cohort

### Sweden

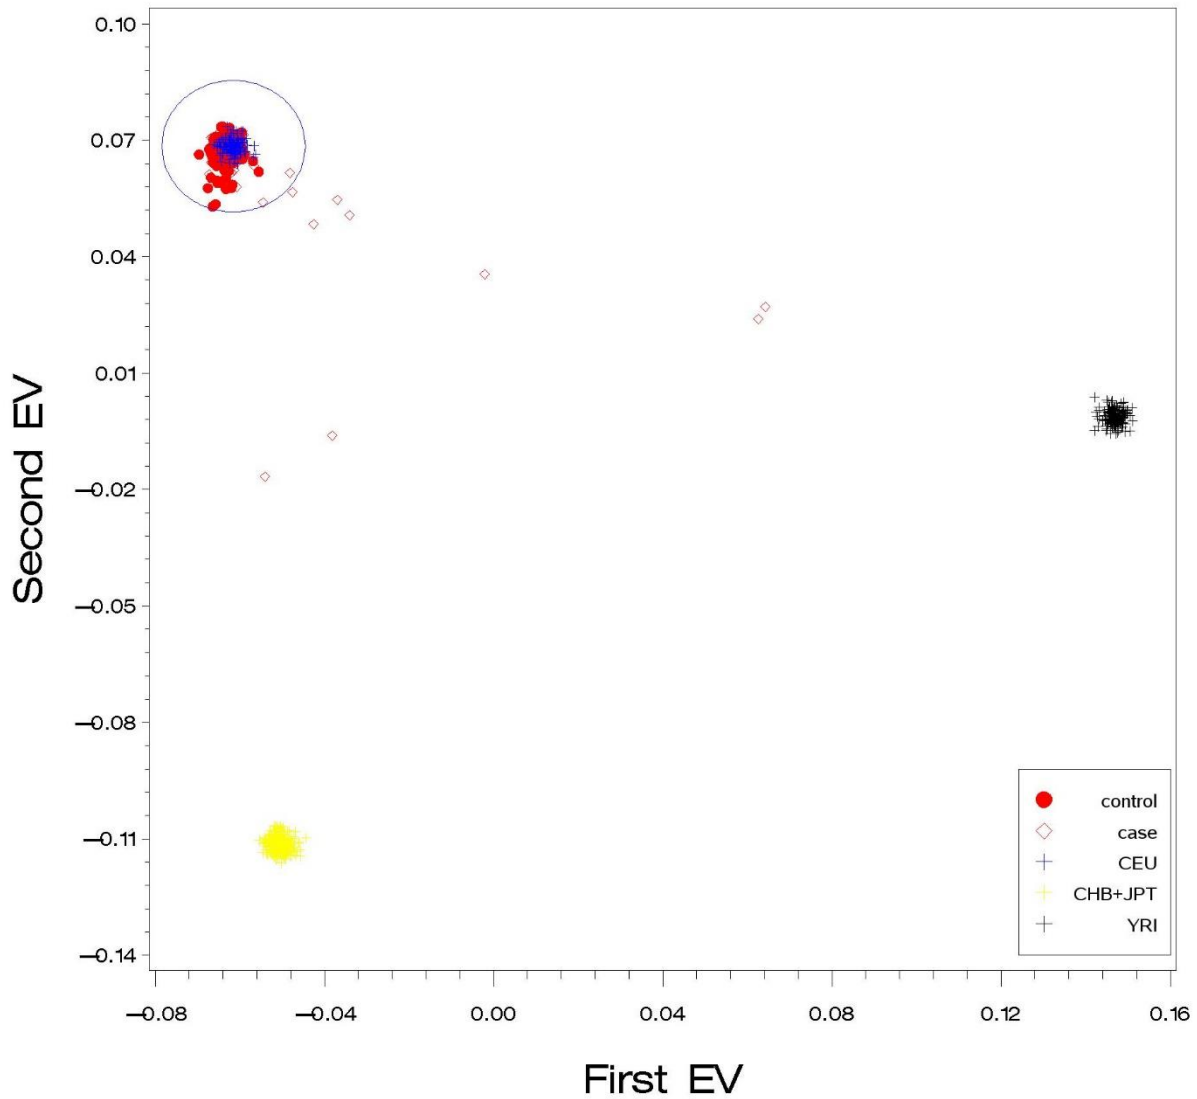

Only individuals within the red ellipses defined by condition (1) were used for the statistical analysis, individuals outside the red ellipsis were discarded. (CEU) Utah Residents from North and West Europe; (CHB) Han Chinese in Beijing, China; (JPT) Japanese in Tokyo, Japan; (YRI) Yoruba in Ibadan, Nigeria.

**Supplementary Figure 14:** Principal component analysis of GWAS 1 strata.

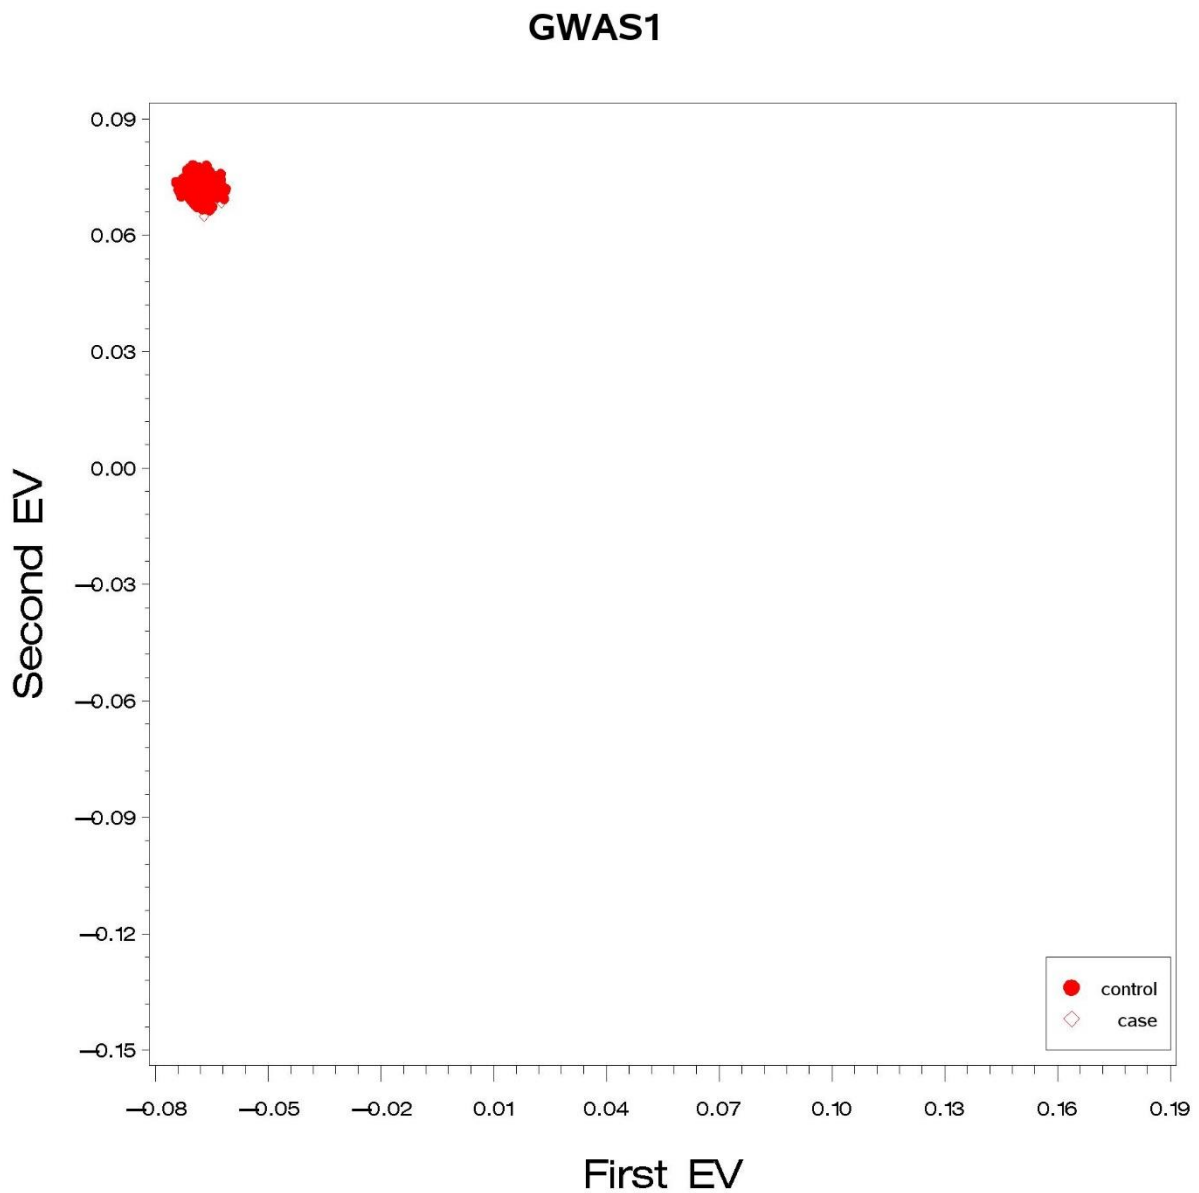

Only individuals within the red ellipses defined by condition (1) were used for the statistical analysis, individuals outside the red ellipsis were discarded. (CEU) Utah Residents from North and West Europe; (CHB) Han Chinese in Beijing, China; (JPT) Japanese in Tokyo, Japan; (YRI) Yoruba in Ibadan, Nigeria.

**Supplementary Figure 15:** Principal component analysis of GWAS 2 strata.

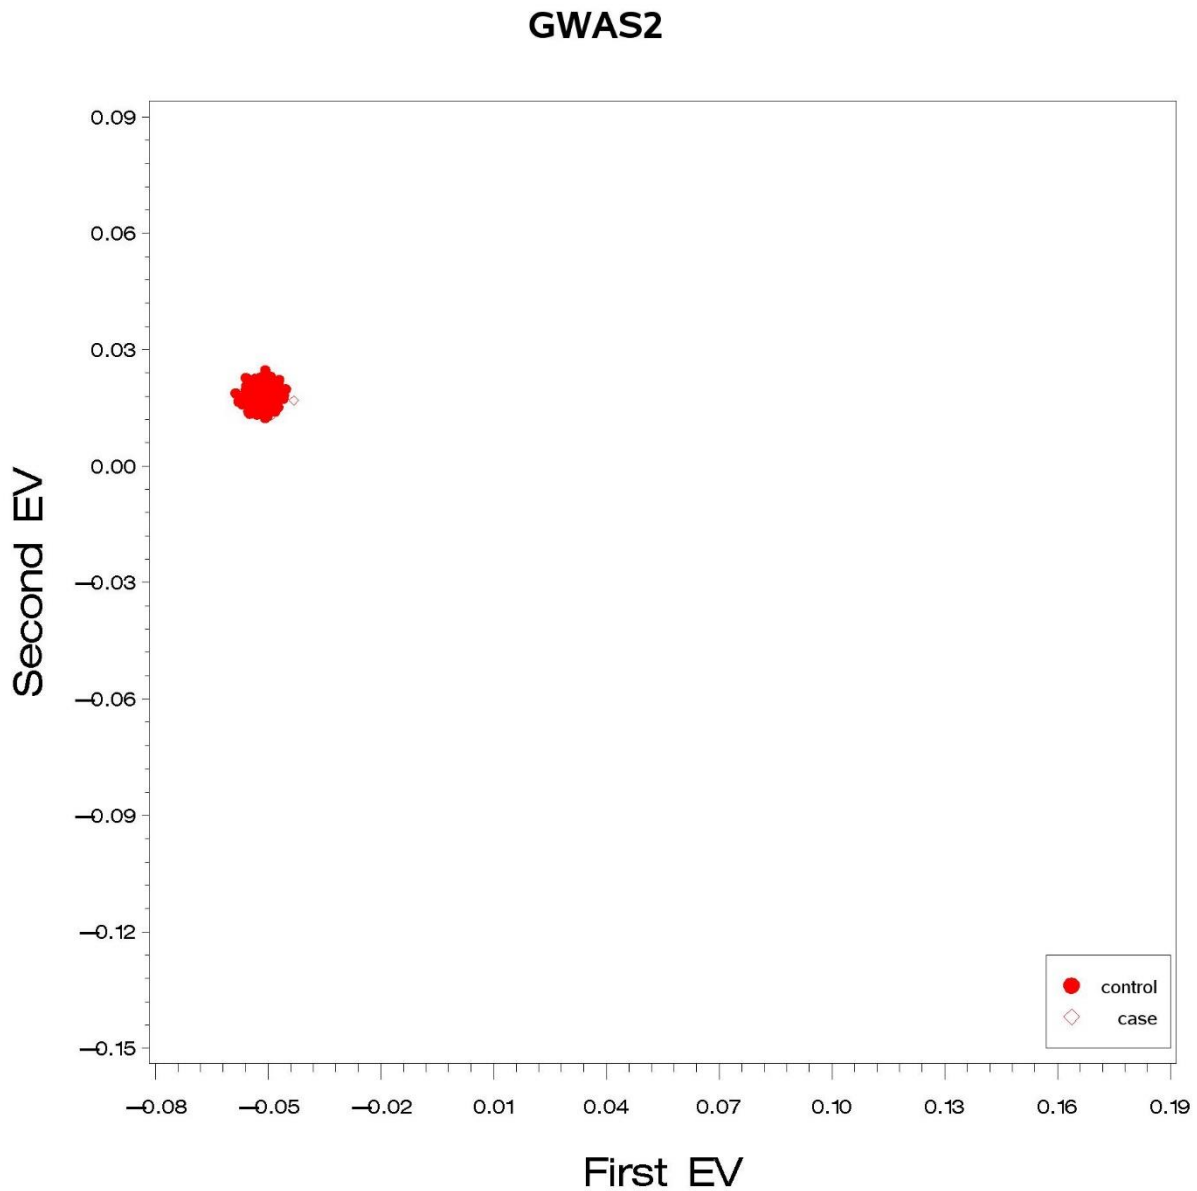

Only individuals within the red ellipses defined by condition (1) were used for the statistical analysis, individuals outside the red ellipsis were discarded. (CEU) Utah Residents from North and West Europe; (CHB) Han Chinese in Beijing, China; (JPT) Japanese in Tokyo, Japan; (YRI) Yoruba in Ibadan, Nigeria.

**Supplementary Fig. 16:** Meta-analysis Q-Q plot

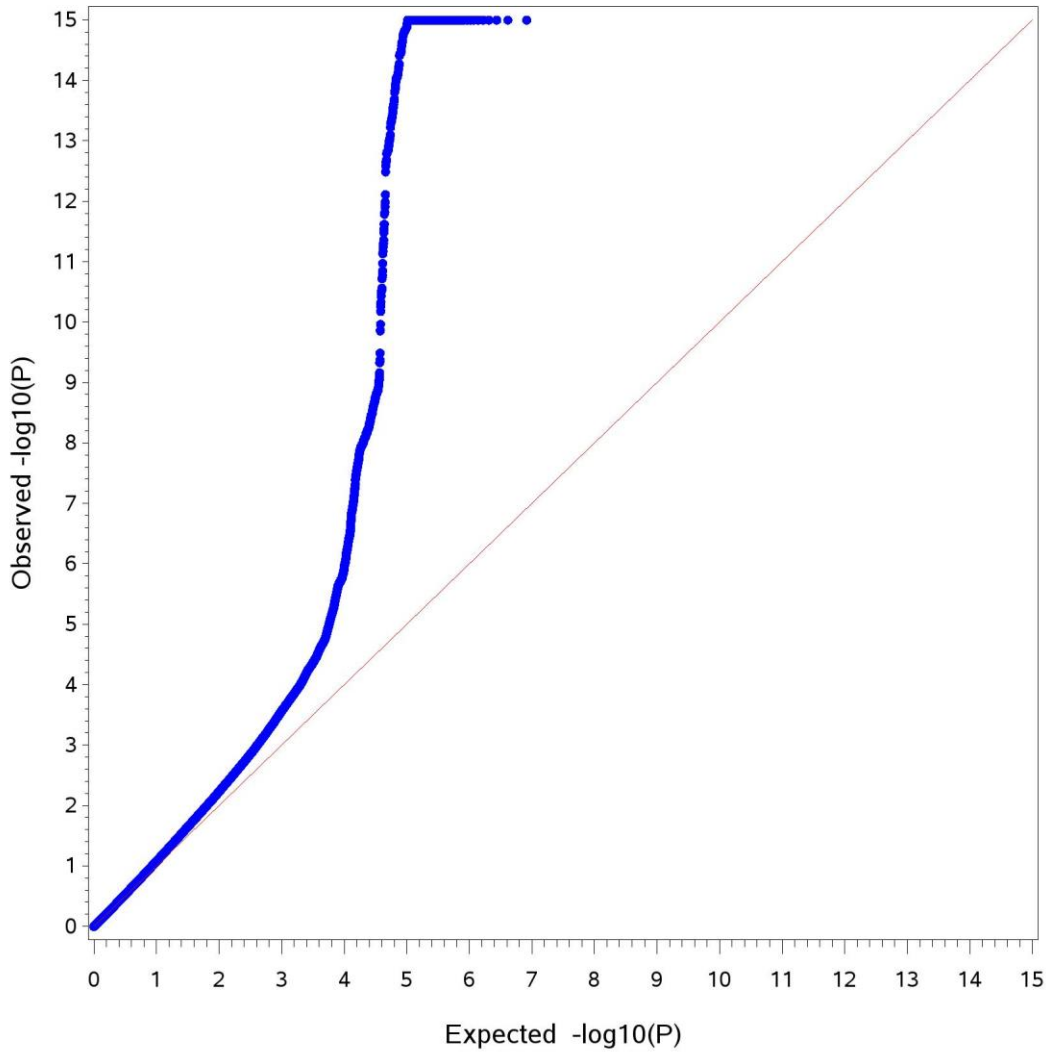

This Figure shows the Q-Q plots for the two-sided  $P$ -values obtained from the GWAS meta-analysis of BEEC. The X axis shows the expected distribution of  $-\log_{10}(P$ -values) under the null hypothesis of no association. The Y axis shows the distribution of the observed  $-\log_{10}(P$ -values) in the meta-analysis. The red line indicates where  $Y=X$ .

**Supplementary Fig. 17:** Manhattan plot of the Genome-Wide Association Studies for the 628 CBE patients and 7,352 ethnically matched controls.

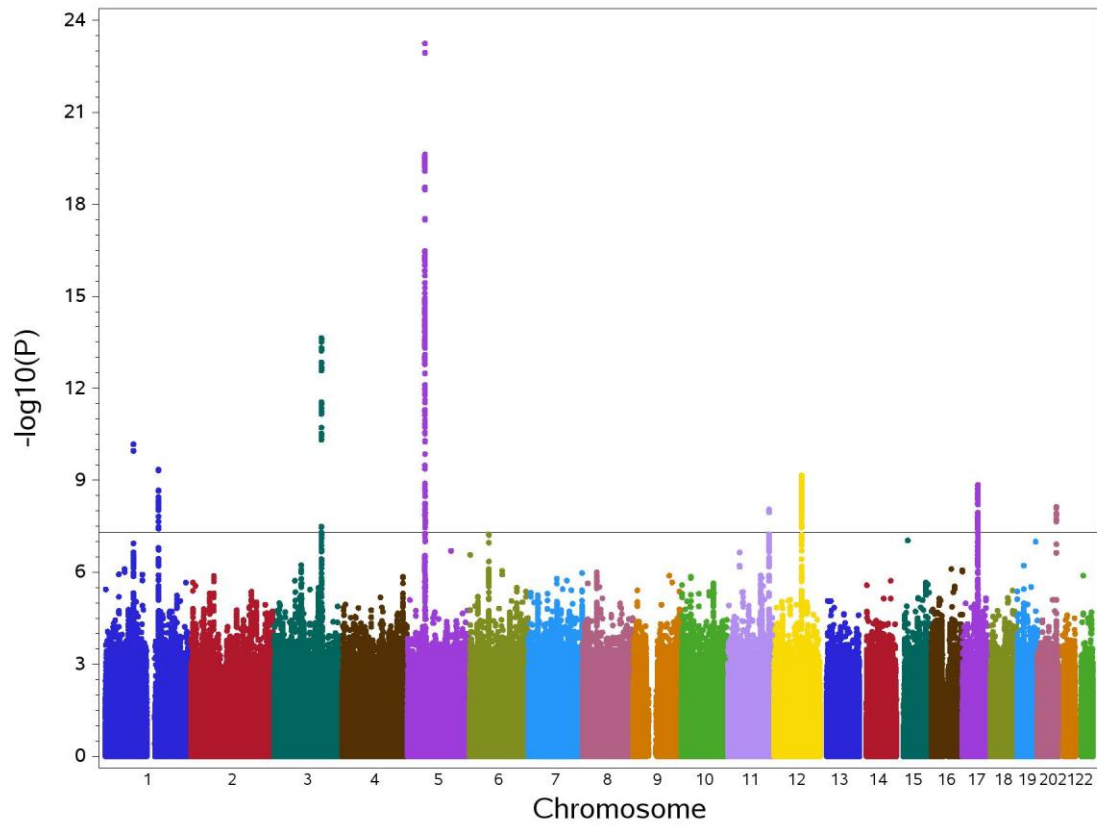

X-axis shows the chromosomes with each dot representing a SNP. Y-axis shows  $-\log_{10}(P\text{-value})$  of the association of each SNP in the CBE cohort. Continuous black horizontal line indicates the threshold of the genome-wide significance at  $P\text{-value}$  of  $5 \times 10^{-8}$ .

**Supplementary Fig. 18:** Anatomical structures and details of mouse embryos dissected tissues for RNA-seq.

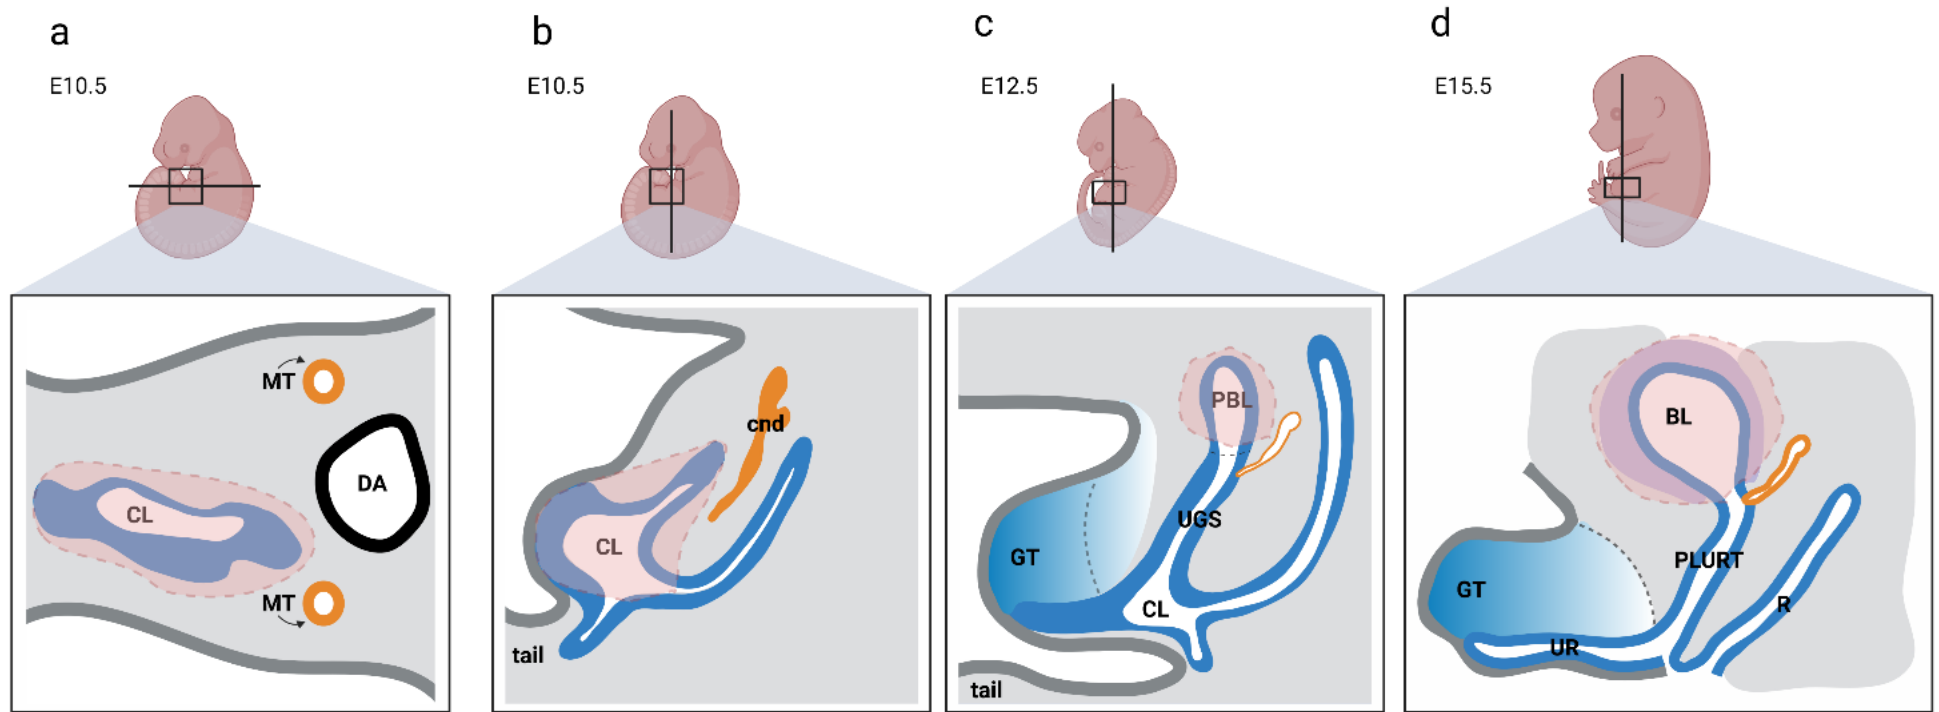

**a)** Embryonic day E10.5, transversal section. **b)** Embryonic day E10.5, sagittal section. **c)** Embryonic day E12.5, sagittal section. **d)** Embryonic day E15.5, sagittal section. Nomenclature: cloaca (CL); dorsal aorta (DA); mesonephric tubules (MT); common nephric duct (cnd); genital tubercle (GT); urogenital sinus (UGS); primitive bladder (PBL); urethra (UR); pelvic urethra (PLURT); rectum (R); bladder (BL).

**Supplementary Fig. 19:** Timelines of mouse embryonic and human embryonic and fetal bladder sampling for RNA-seq used in this study.

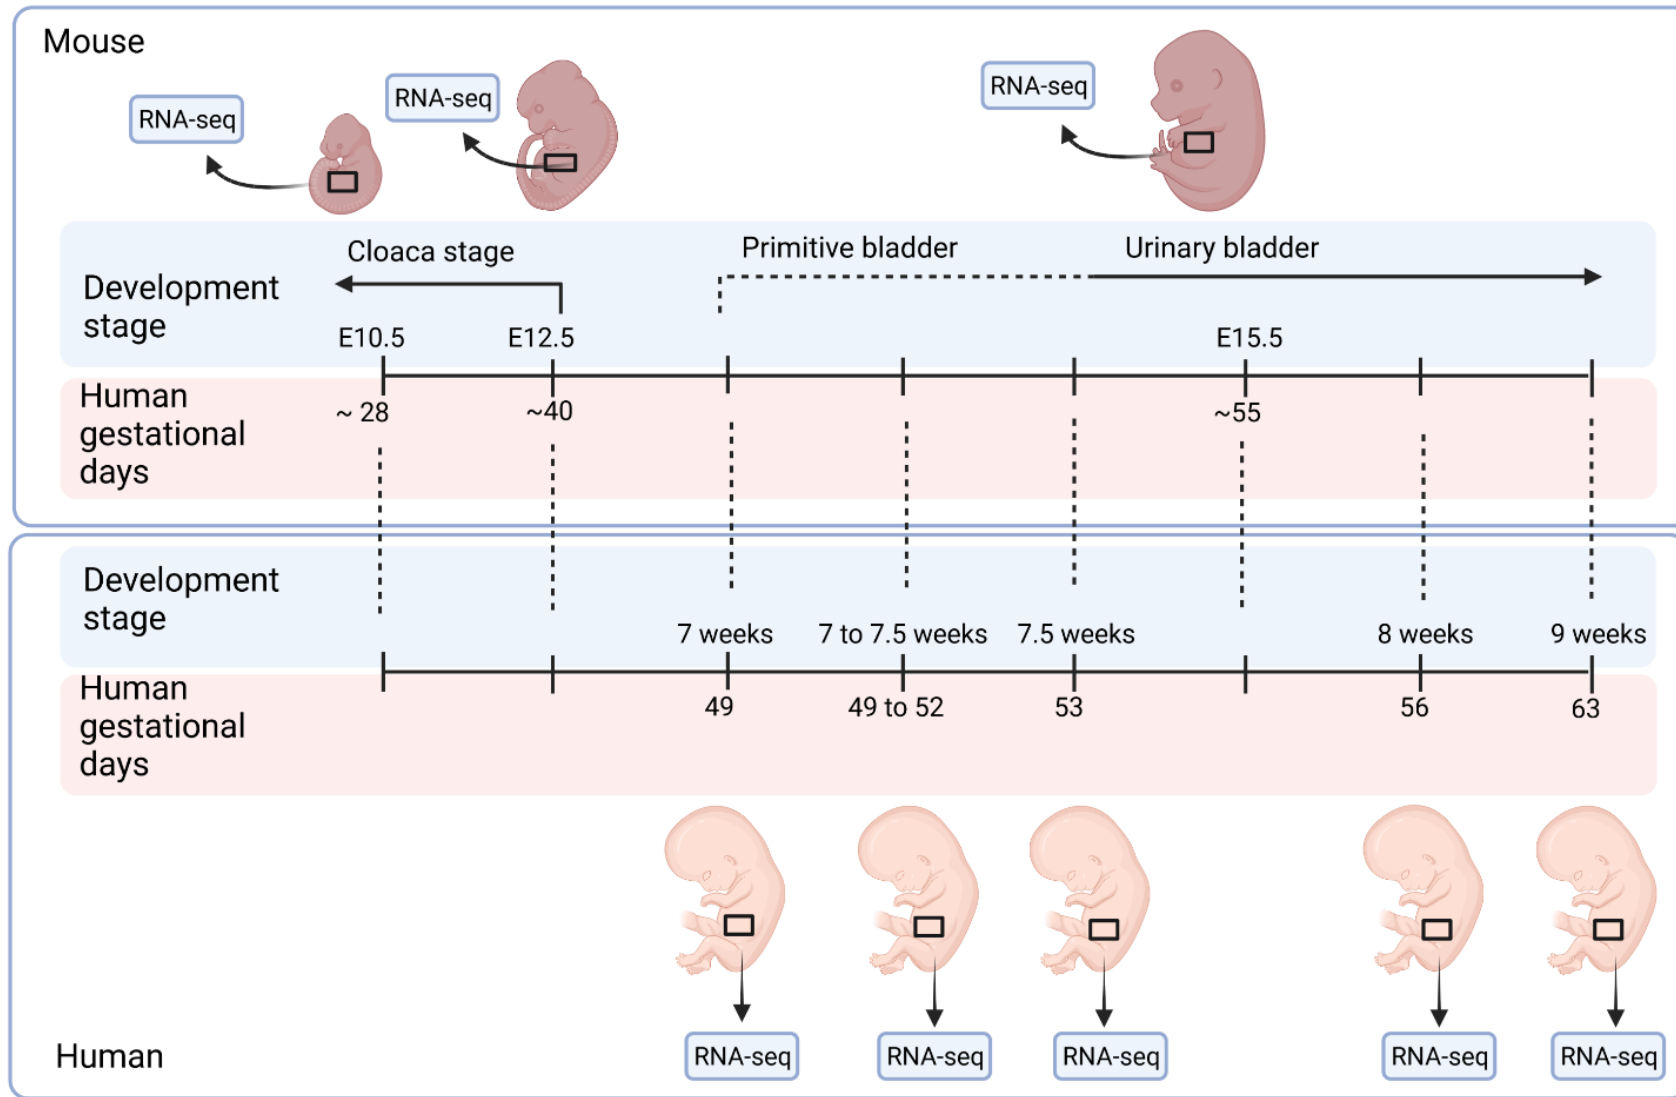

**Supplementary Fig. 20:** Regional association plots for conditional logistic regression in genome-wide significant locus in chromosome 1, region 1.

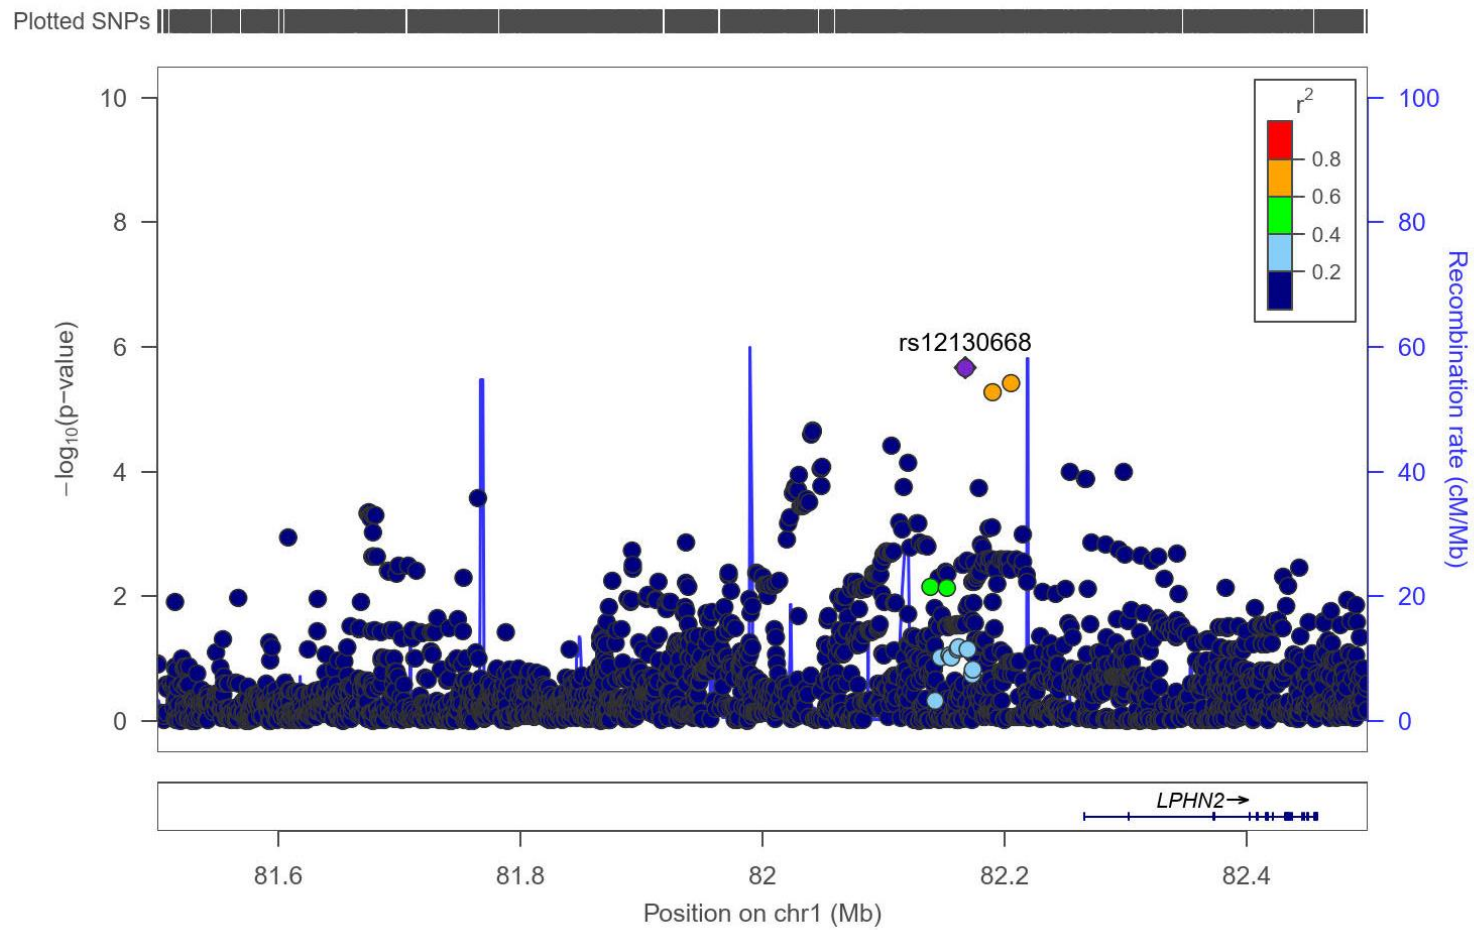

Every dot is a SNP in a 1 Megabase (Mb) window. X-axes represent chromosome position of the SNP and the relative genes position in the locus. Y-axes represent  $-\log_{10}(P\text{-value})$  of each SNP. Blue peaks indicate the Recombination rate (cM/Mb). The most significant SNP is labelled in purple.



**Supplementary Fig. 21:** Regional association plots for conditional logistic regression in genome-wide significant locus in chromosome 1, region 2.

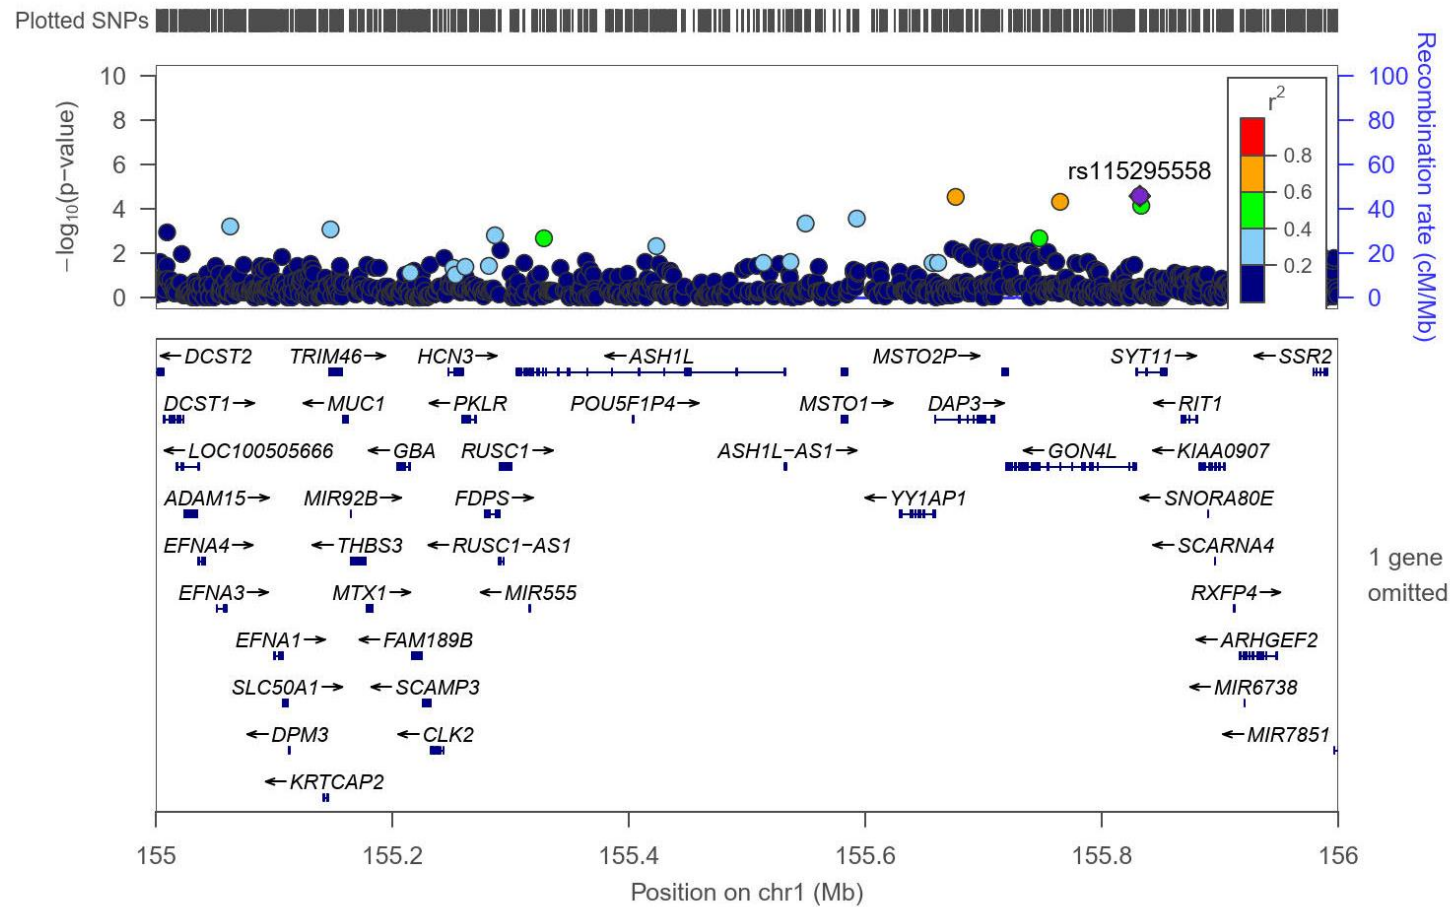

Every dot is a SNP in a 1 Megabase (Mb) window. X-axes represent chromosome position of the SNP and the relative genes position in the locus. Y-axes represent  $-\log_{10}(P\text{-value})$  of each SNP. Blue peaks indicate the Recombination rate (cM/Mb). The most significant SNP is labelled in purple.

**Supplementary Fig. 22:** Regional association plots for conditional logistic regression in genome-wide significant locus in chromosome 3.

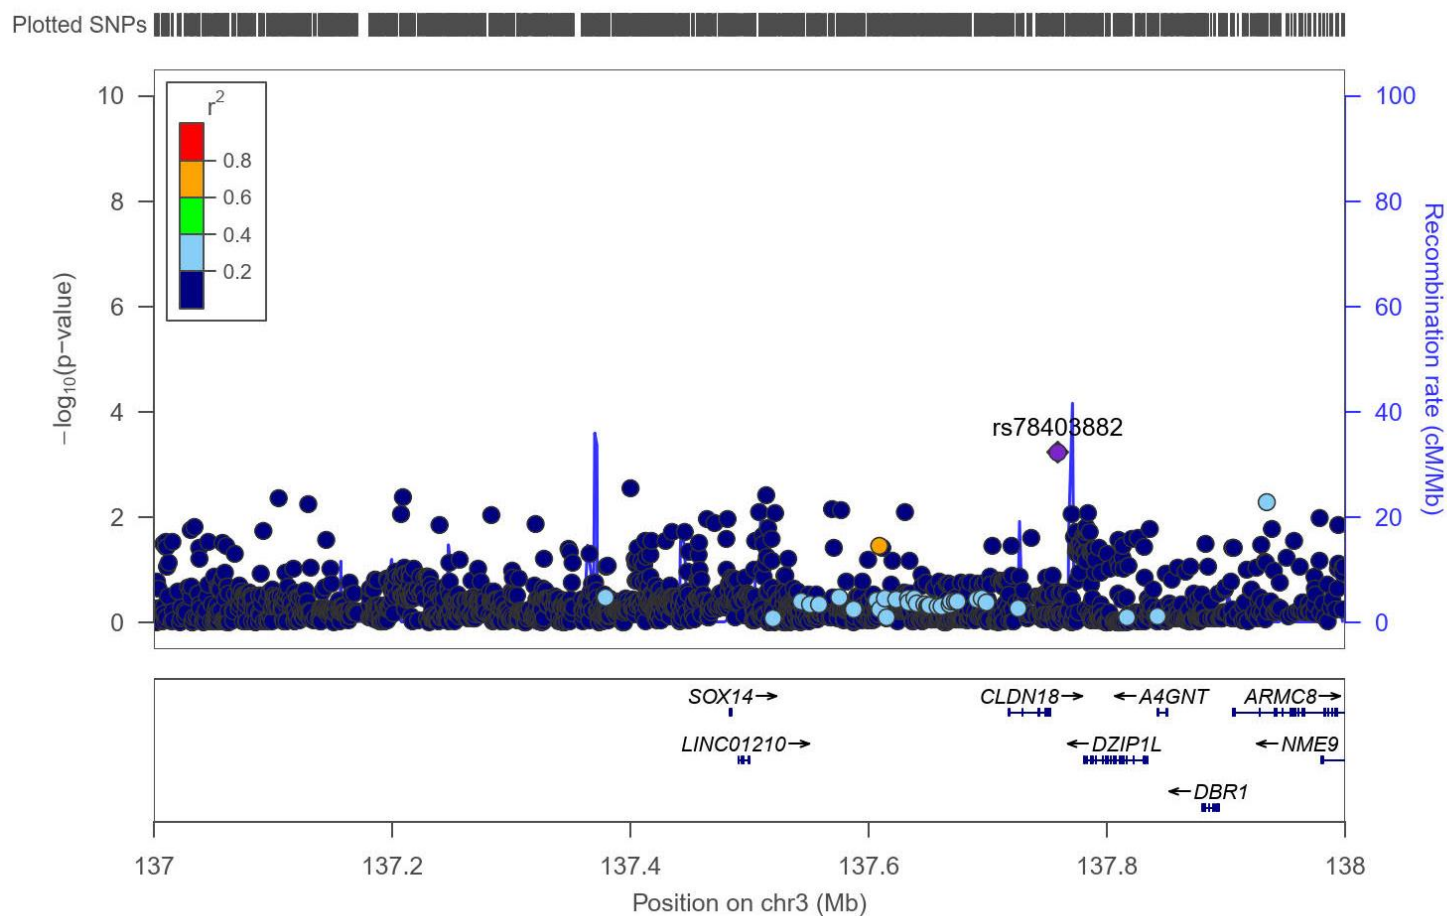

Every dot is a SNP in a 1 Megabase (Mb) window. X-axes represent chromosome position of the SNP and the relative genes position in the locus. Y-axes represent  $-\log_{10}(P\text{-value})$  of each SNP. Blue peaks indicate the Recombination rate (cM/Mb). The most significant SNP is labelled in purple.

**Supplementary Fig. 23:** Regional association plots for conditional logistic regression in genome-wide significant locus in chromosome 5.

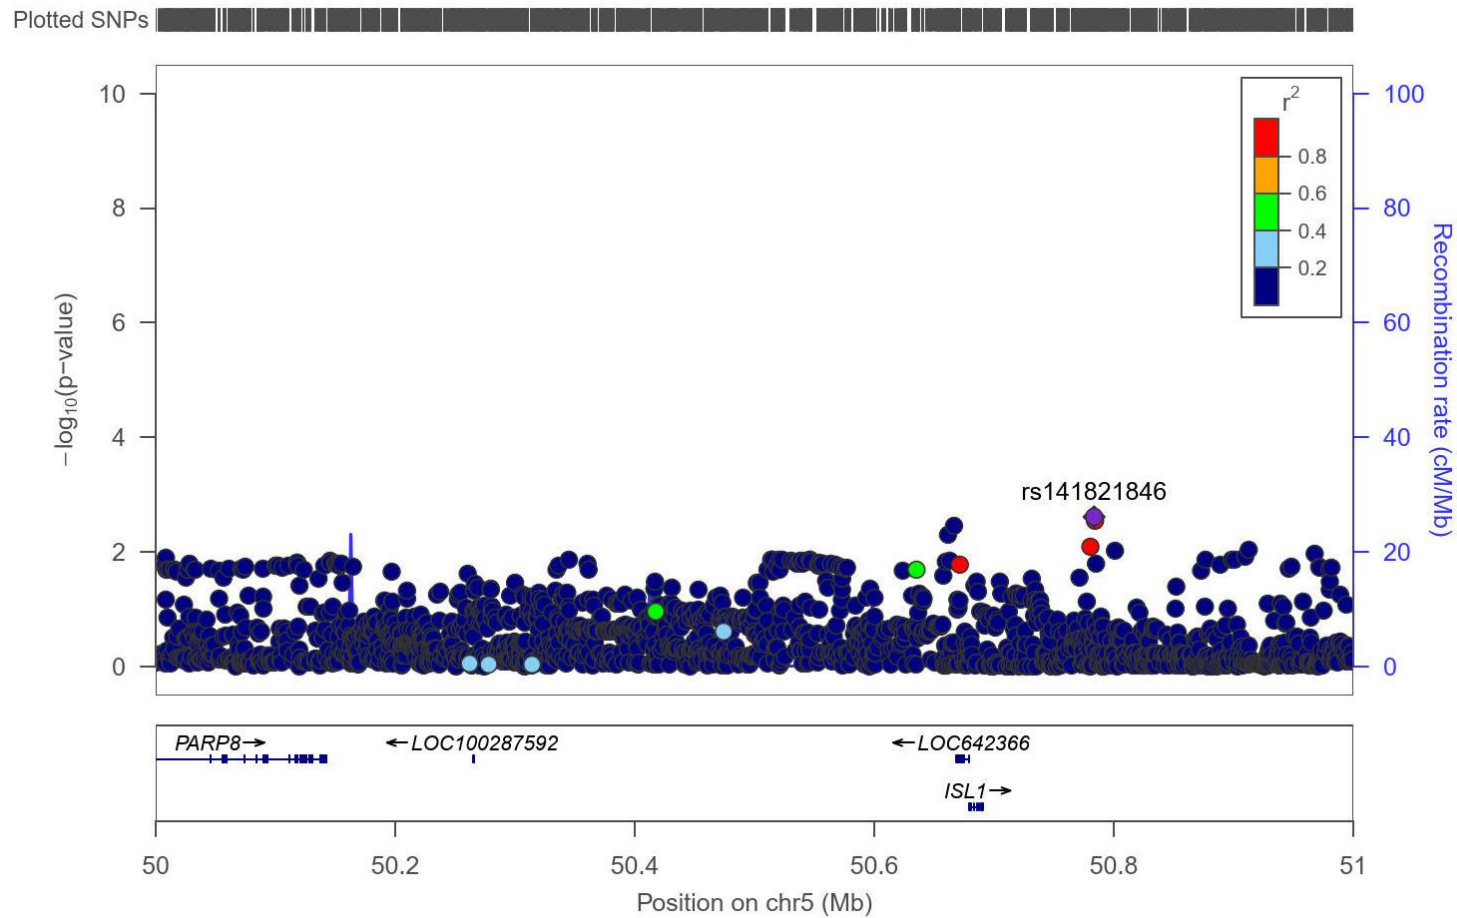

Every dot is a SNP in a 1 Megabase (Mb) window. X-axes represent chromosome position of the SNP and the relative genes position in the locus. Y-axes represent  $-\log_{10}(P\text{-value})$  of each SNP. Blue peaks indicate the Recombination rate (cM/Mb). The most significant SNP is labelled in purple.

**Supplementary Fig. 24:** Regional association plots for conditional logistic regression in genome-wide significant locus in chromosome 11.

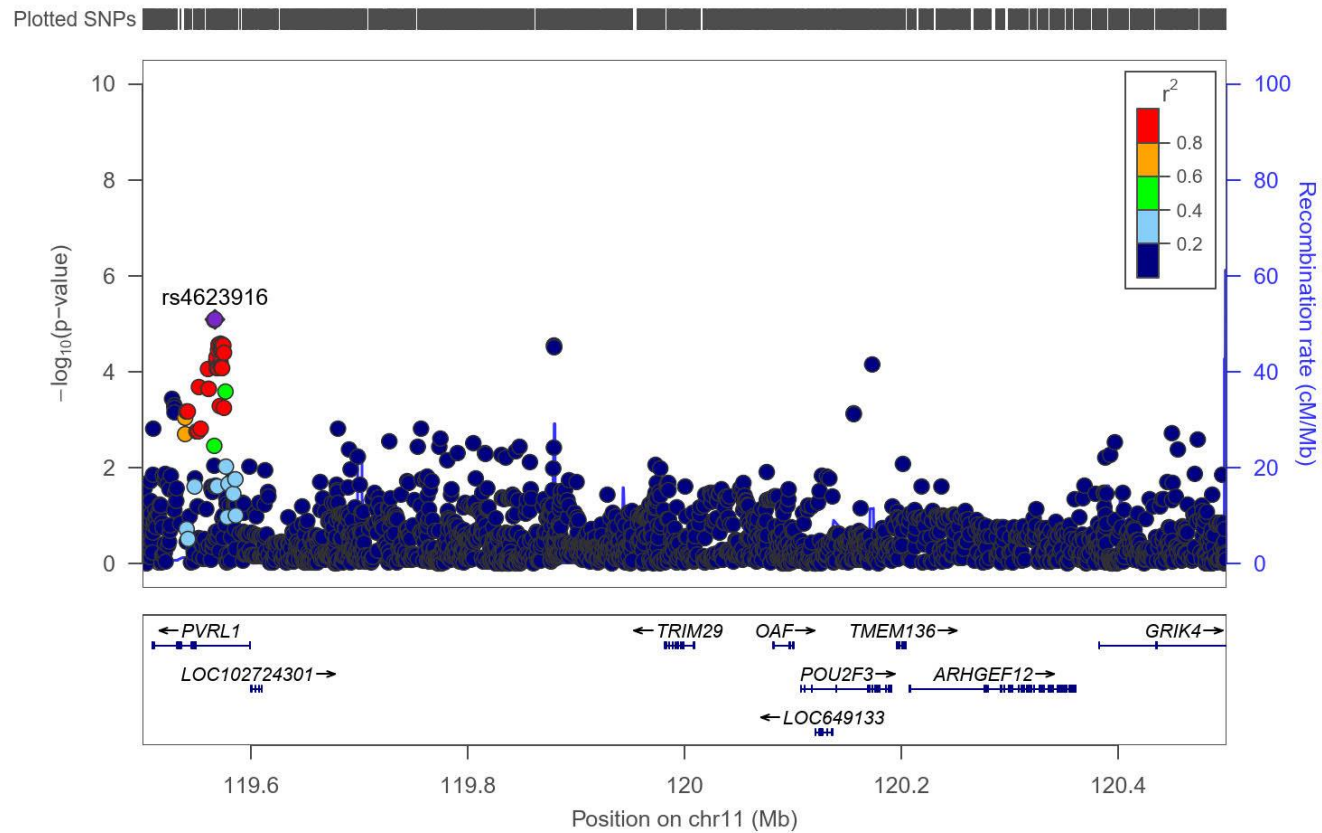

Every dot is a SNP in a 1 Megabase (Mb) window. X-axes represent chromosome position of the SNP and the relative genes position in the locus. Y-axes represent  $-\log_{10}(P\text{-value})$  of each SNP. Blue peaks indicate the Recombination rate (cM/Mb). The most significant SNP is labelled in purple.

**Supplementary Fig. 25:** Regional association plots for conditional logistic regression in genome-wide significant locus in chromosome 12.

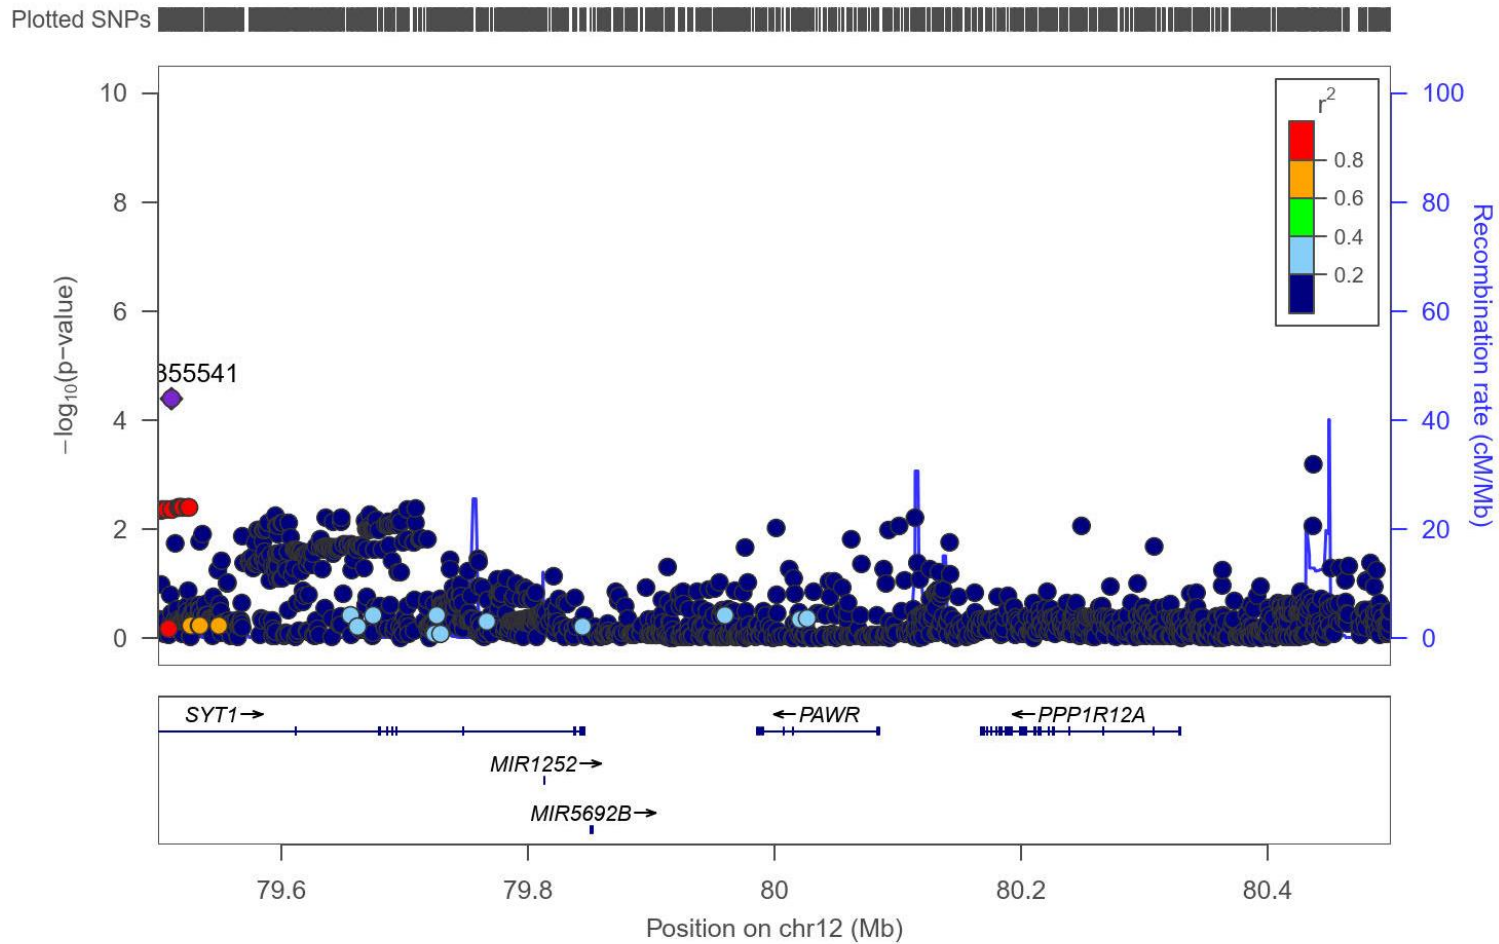

Every dot is a SNP in a 1 Megabase (Mb) window. X-axes represent chromosome position of the SNP and the relative genes position in the locus. Y-axes represent  $-\log_{10}(P\text{-value})$  of each SNP. Blue peaks indicate the Recombination rate (cM/Mb). The most significant SNP is labelled in purple.

**Supplementary Fig. 26:** Regional association plots for conditional logistic regression in genome-wide significant locus in chromosome 17.

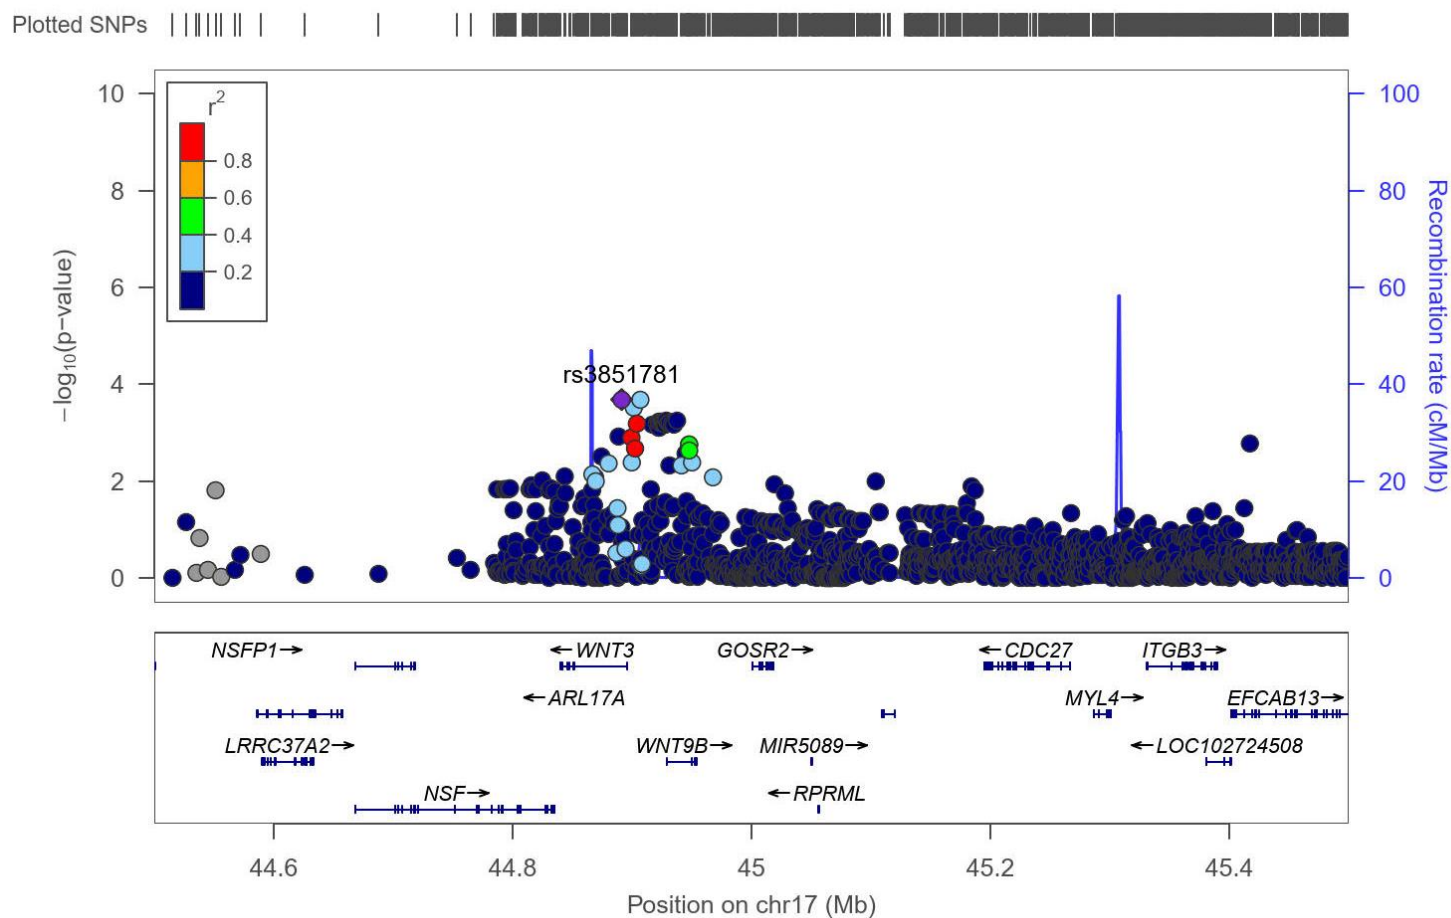

Every dot is a SNP in a 1 Megabase (Mb) window. X-axes represent chromosome position of the SNP and the relative genes position in the locus. Y-axes represent  $-\log_{10}(P\text{-value})$  of each SNP. Blue peaks indicate the Recombination rate (cM/Mb). The most significant SNP is labelled in purple.

**Supplementary Fig. 27:** Regional association plots for conditional logistic regression in genome-wide significant locus in chromosome 20.

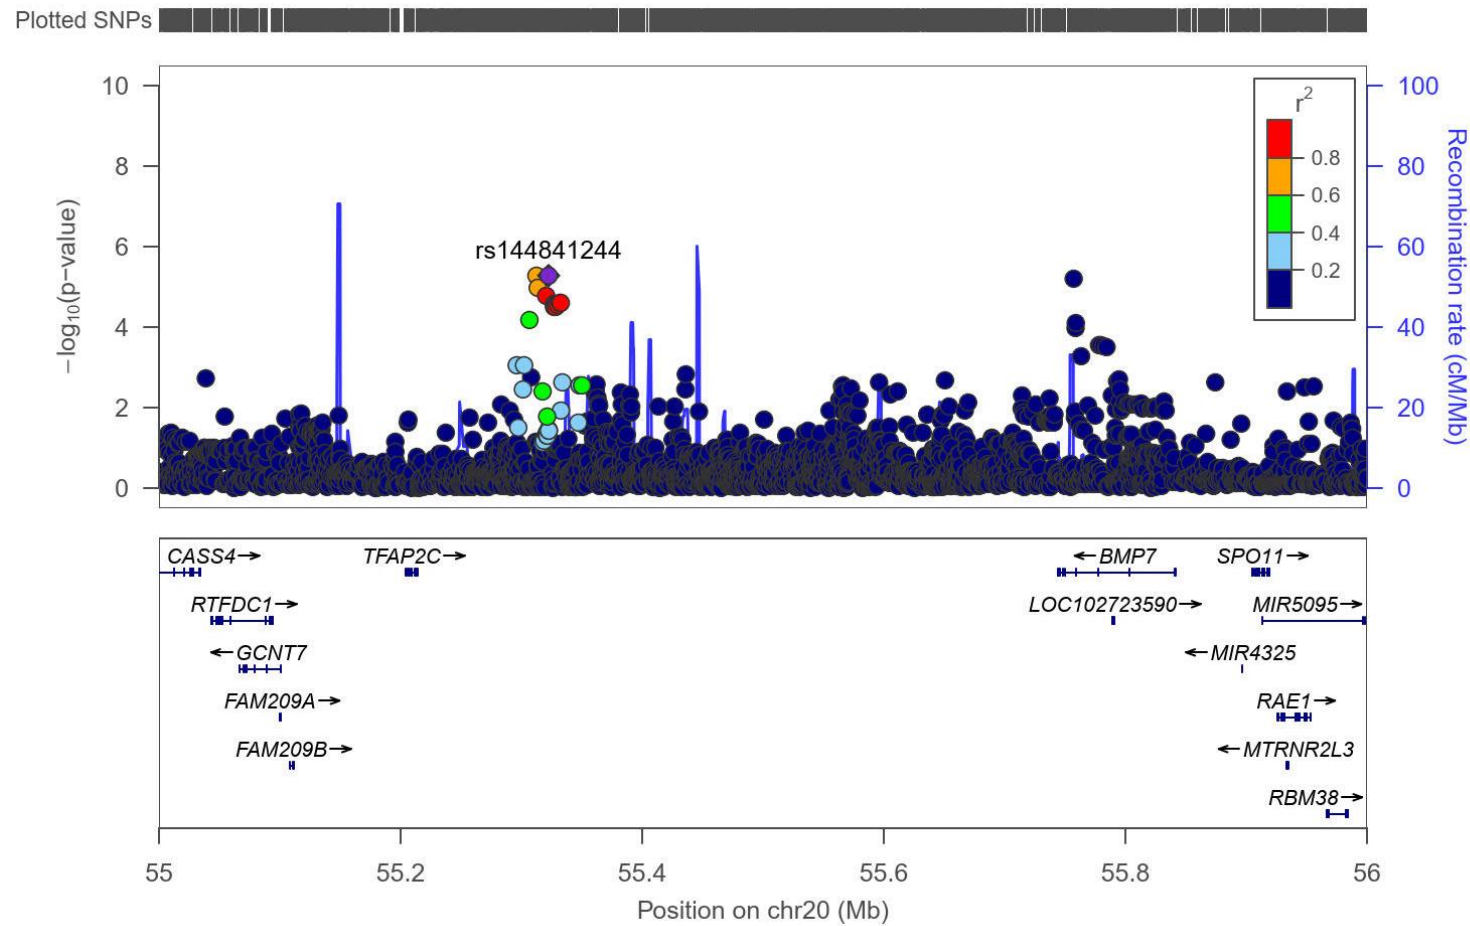

Every dot is a SNP in a 1 Megabase (Mb) window. X-axes represent chromosome position of the SNP and the relative genes position in the locus. Y-axes represent  $-\log_{10}(P\text{-value})$  of each SNP. Blue peaks indicate the Recombination rate (cM/Mb). The most significant SNP is labelled in purple.

**Supplementary Fig. 28. Network analysis of putative candidate genes.**

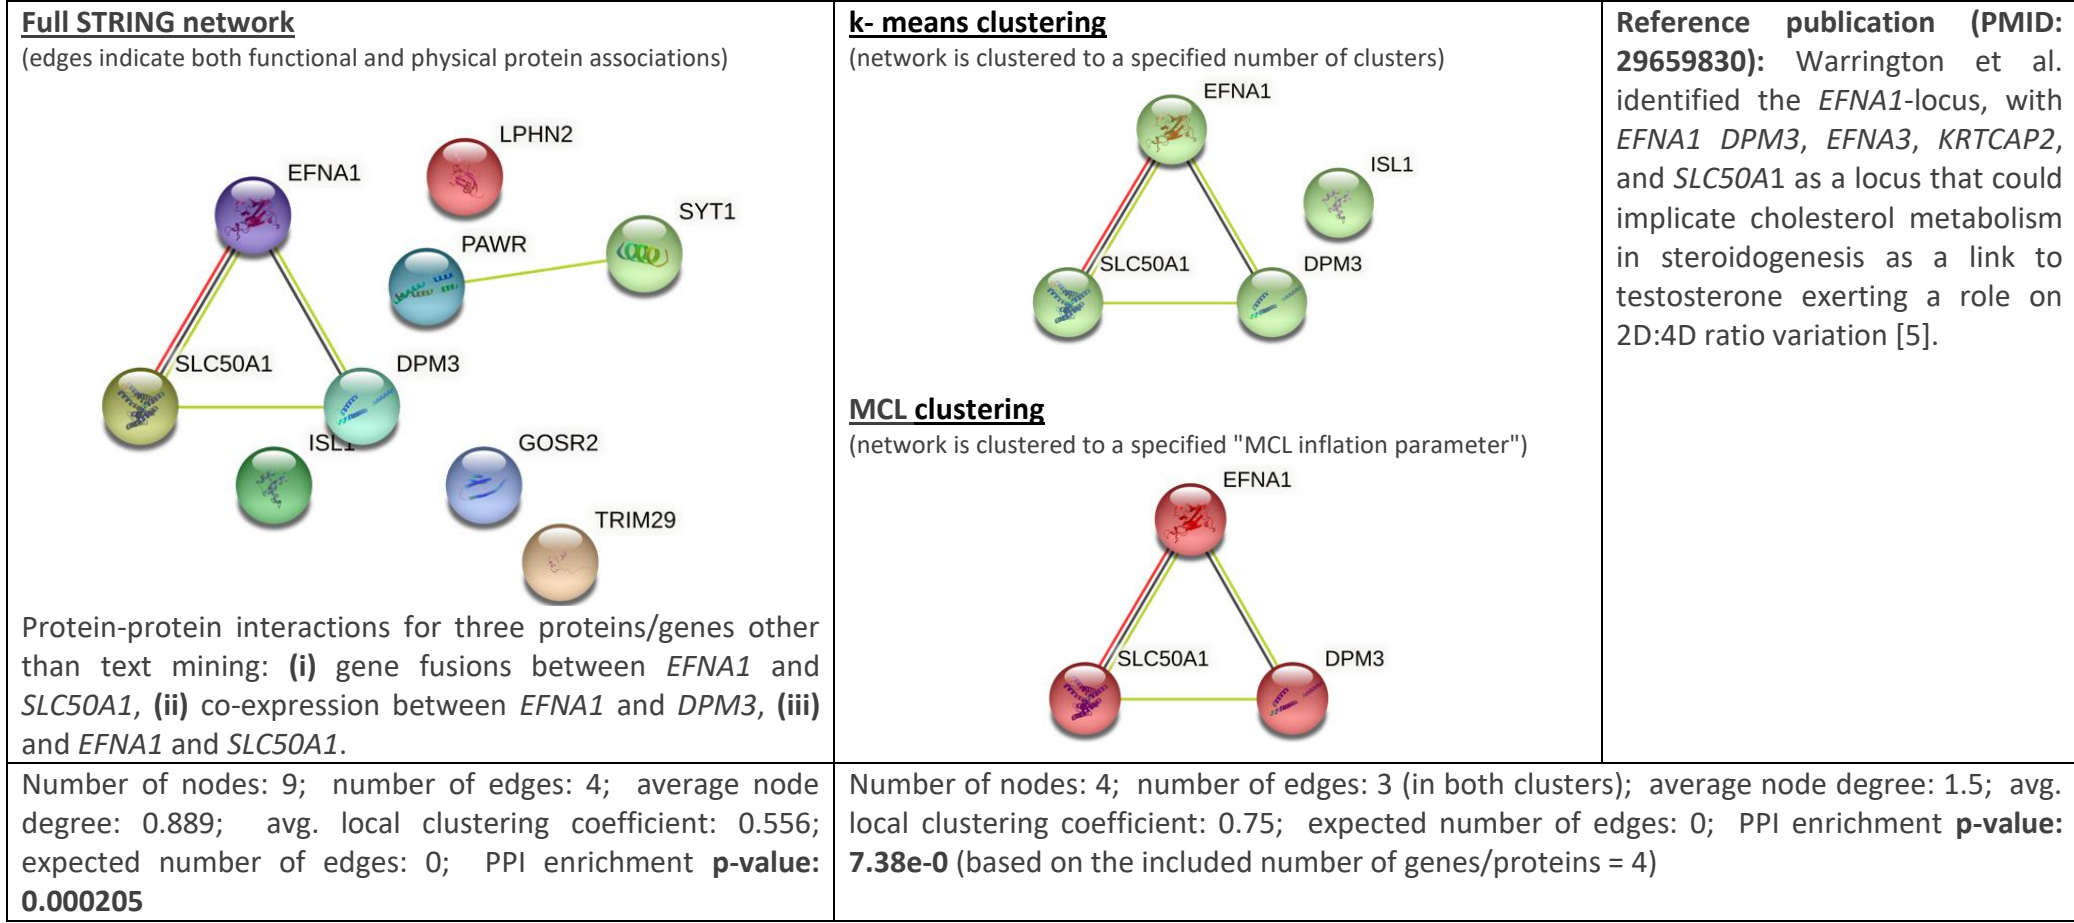

**Edges:**

|                                                                                                                                                                                                                                                       |                                                                                                                                                                                                                                                                                                                      |                                                                                                                                                                                                                                                                                                                                                                                                                              |                                                                                                                                                                                                                                                                                                                                                                                                      |
|-------------------------------------------------------------------------------------------------------------------------------------------------------------------------------------------------------------------------------------------------------|----------------------------------------------------------------------------------------------------------------------------------------------------------------------------------------------------------------------------------------------------------------------------------------------------------------------|------------------------------------------------------------------------------------------------------------------------------------------------------------------------------------------------------------------------------------------------------------------------------------------------------------------------------------------------------------------------------------------------------------------------------|------------------------------------------------------------------------------------------------------------------------------------------------------------------------------------------------------------------------------------------------------------------------------------------------------------------------------------------------------------------------------------------------------|
| <p>Edges represent protein-protein associations<br/><i>associations are meant to be specific and meaningful, i.e. proteins jointly contribute to a shared function; this does not necessarily mean they are physically binding to each other.</i></p> | <p><b>Known Interactions</b></p> <ul style="list-style-type: none"> <li> from curated databases</li> <li> experimentally determined</li> </ul> | <p><b>Predicted Interactions</b></p> <ul style="list-style-type: none"> <li> gene neighborhood</li> <li> gene fusions</li> <li> gene co-occurrence</li> </ul> | <p><b>Others</b></p> <ul style="list-style-type: none"> <li> textmining</li> <li> co-expression</li> <li> protein homology</li> </ul> |
|-------------------------------------------------------------------------------------------------------------------------------------------------------------------------------------------------------------------------------------------------------|----------------------------------------------------------------------------------------------------------------------------------------------------------------------------------------------------------------------------------------------------------------------------------------------------------------------|------------------------------------------------------------------------------------------------------------------------------------------------------------------------------------------------------------------------------------------------------------------------------------------------------------------------------------------------------------------------------------------------------------------------------|------------------------------------------------------------------------------------------------------------------------------------------------------------------------------------------------------------------------------------------------------------------------------------------------------------------------------------------------------------------------------------------------------|
